# Supplementary material for: Long-term impact of a 4-day feed restriction at the protozoea stage on metabolic gene expressions of whiteleg shrimp (Litopenaeus vannamei)
Source: PeerJ. 2020 Mar 20;8:e8715. doi: 10.7717/peerj.8715 (PMC7087488; doi:10.7717/peerj.8715)
Supplement: Supplemental Information 1 [file peerj-08-8715-s001.xlsx]

## Sheet: EF1 
Manip Luis.P_ShrimpDay3_Trial 4_RT19/07/2017_Mélanie SERUSIER
Gene EF1
Pos	Name	Cp	Diff	Mean	SD		Position	Name	Ct
G5	D20	16.81	0.19	16.8675	-1.035		A5	bADN	36.09
G6	D20	16.79					B5	bADN	35.62
H5	D20	16.89					E5	bPCR	35.64
H6	D20	16.98					F5	bPCR	35.55
I5	D40	17.83	0.18	17.9025	-1.09		C5	bRT	36.41
I6	D40	17.81					D5	bRT
J5	D40	17.99
J6	D40	17.98					Error	0.00318
K5	D80	18.94	0.2	18.9925	-1.085		Efficiency	1.904
K6	D80	18.89					Link	0
L5	D80	19.05
L6	D80	19.09
M5	D160	20.02	0.12	20.0775	-1.0225
M6	D160	20.05
N5	D160	20.1
N6	D160	20.14
O5	D320	20.92	0.26	21.1
O6	D320	21.18
P5	D320	21.18
P6	D320	21.12
Conditions	Position	Name	Ct	Diff Ct	Mean Ct	∆ Mean	Mean of means CT	Concentration	Mean
Control	A1	1a	18.36	-0.12	18.42	0.54	18.15	0.378	0.439
Control	B1	1a	18.48					0.349
Control	A2	1b	17.81	-0.14	17.88			0.538
Control	B2	1b	17.95					0.491
Restriction	C1	2a	18.79	-0.08	18.83	0.23	18.715	0.286	0.30075
Restriction	D1	2a	18.87					0.271
Restriction	C2	2b	18.54	-0.12	18.6			0.336
Restriction	D2	2b	18.66					0.31
Control	E1	3a	19.53	-0.14	19.6	1.13	19.035	0.178	0.2605
Control	F1	3a	19.67					0.162
Control	E2	3b	18.41	-0.12	18.47			0.365
Control	F2	3b	18.53					0.337
Restriction	G1	4a	18.72	-0.13	18.785	-0.8	19.185	0.298	0.22875
Restriction	H1	4a	18.85					0.275
Restriction	G2	4b	19.54	-0.09	19.585			0.176
Restriction	H2	4b	19.63					0.166
Control	I1	5a	19.54	-0.1	19.59	1.07	19.055	0.177	0.2555
Control	J1	5a	19.64					0.165
Control	I2	5b	18.45	-0.14	18.52			0.355
Control	J2	5b	18.59					0.325
Restriction	K1	6a	18.88	-0.11	18.935	0.29	18.79	0.269	0.28675
Restriction	L1	6a	18.99					0.251
Restriction	K2	6b	18.56	-0.17	18.645			0.33
Restriction	L2	6b	18.73					0.297
Control	M1	7a	18.64	-0.16	18.72	-0.97	19.205	0.315	0.23
Control	N1	7a	18.8					0.285
Control	M2	7b	19.62	-0.14	19.69			0.167
Control	N2	7b	19.76					0.153
Restriction	O1	8a	18.92	-0.03	18.935	0.32	18.775	0.263	0.29
Restriction	P1	8a	18.95					0.258
Restriction	O2	8b	18.57	-0.09	18.615			0.328
Restriction	P2	8b	18.66					0.311
Control	A3	9a	18.49	-0.16	18.57	-0.245	18.6925	0.346	0.30525
Control	B3	9a	18.65					0.312
Control	A4	9b	18.72	-0.19	18.815			0.299
Control	B4	9b	18.91					0.264
Restriction	C3	10a	18.64	-0.1	18.69	-1.11	19.245	0.315	0.22725
Restriction	D3	10a	18.74					0.296
Restriction	C4	10b	19.77	-0.06	19.8			0.152
Restriction	D4	10b	19.83					0.146
Control	E3	11a	18.74	-0.19	18.835	-0.07	18.87	0.295	0.271
Control	F3	11a	18.93					0.26
Control	E4	11b	18.86	-0.09	18.905			0.272
Control	F4	11b	18.95					0.257
Restriction	G3	12a	19.6	-0.1	19.65	-0.38	19.84	0.169	0.14625
Restriction	H3	12a	19.7					0.159
Restriction	G4	12b	19.99	-0.08	20.03			0.132
Restriction	H4	12b	20.07					0.125
Control	I3	13a	18.17	-0.14	18.24	-0.375	18.4275	0.425	0.36375
Control	J3	13a	18.31					0.39
Control	I4	13b	18.56	-0.11	18.615			0.332
Control	J4	13b	18.67					0.308
Restriction	K3	14a	19.95	-0.07	19.985	0.135	19.9175	0.136	0.13875
Restriction	L3	14a	20.02					0.13
Restriction	K4	14b	19.75	-0.2	19.85			0.154
Restriction	L4	14b	19.95					0.135
Control	M3	15a	21.12	-0.05	21.145	-1.015	21.6525	0.0639	0.047675
Control	N3	15a	21.17					0.0616
Control	M4	15b	22.1	-0.12	22.16			0.0339
Control	N4	15b	22.22					0.0313
Restriction	O3	16a	19.22	0.28	19.08	0.56	18.8	0.216	0.28925
Restriction	P3	16a	18.94					0.26
Restriction	O4	16b	18.47	-0.1	18.52			0.351
Restriction	P4	16b	18.57					0.33

## Sheet: Luciferase
Manip Luis.P_ShrimpDay3_Trial 4_RT19/07/2017_Mélanie SERUSIER
Gene Luciferase
Pos	Name	Cp	Diff	Mean	SD		Position	Name	Ct
G11	D20	25.08	0.27	25.2175	-1.0225		A11	bADN	37.23
G12	D20	25.22					B11	bADN	39.21
H11	D20	25.22					E11	bPCR	34.9
H12	D20	25.35					F11	bPCR	38.16
I11	D40	26.19	0.13	26.24	-1.175		C11	bRT	37.12
I12	D40	26.24					D11	bRT	40
J11	D40	26.21
J12	D40	26.32					Error	0.0107
K11	D80	27.31	0.39	27.415	-1.1075		Efficiency	1.858
K12	D80	27.26					Link	0
L11	D80	27.65
L12	D80	27.44
M11	D160	28.17	0.6	28.5225	-0.915
M12	D160	28.56
N11	D160	28.59
N12	D160	28.77				Point enlevé
O11	D320	29.42	0.29	29.4375
O12	D320	29.55
P11	D320	29.52
P12	D320	29.26
Conditions	Position	Name	Ct	Diff Ct	Mean Ct	∆ Mean	Mean of means CT	Concentration	Mean
Control	A7	1a	27.78	-0.25	27.905	0.515	27.6475	0.2	0.2195
Control	B7	1a	28.03					0.171
Control	A8	1b	27.52	0.26	27.39			0.233
Control	B8	1b	27.26					0.274
Restriction	C7	2a	27.26	-0.09	27.305	0.105	27.2525	0.275	0.276
Restriction	D7	2a	27.35					0.26
Restriction	C8	2b	27.18	-0.04	27.2			0.289
Restriction	D8	2b	27.22					0.28
Control	E7	3a	28.11	-0.5	28.36	1.415	27.6525	0.162	0.23675
Control	F7	3a	28.61					0.119
Control	E8	3b	27	0.11	26.945			0.322
Control	F8	3b	26.89					0.344
Restriction	G7	4a	27.01	-0.27	27.145	-0.615	27.4525	0.321	0.249
Restriction	H7	4a	27.28					0.272
Restriction	G8	4b	27.79	0.06	27.76			0.197
Restriction	H8	4b	27.73					0.206
Control	I7	5a	27.7	0.1	27.65	0.85	27.225	0.209	0.2905
Control	J7	5a	27.6					0.223
Control	I8	5b	26.77	-0.06	26.8			0.372
Control	J8	5b	26.83					0.358
Restriction	K7	6a	27.44	0.15	27.365	0.395	27.1675	0.245	0.29275
Restriction	L7	6a	27.29					0.269
Restriction	K8	6b	27.03	0.12	26.97			0.317
Restriction	L8	6b	26.91					0.34
Control	M7	7a	26.87	-0.16	26.95	-0.995	27.4475	0.348	0.25575
Control	N7	7a	27.03					0.316
Control	M8	7b	28.01	0.13	27.945			0.172
Control	N8	7b	27.88					0.187
Restriction	O7	8a	27.04	0.04	27.02	0.01	27.015	0.315	0.32
Restriction	P7	8a	27					0.322
Restriction	O8	8b	27.14	0.26	27.01			0.295
Restriction	P8	8b	26.88					0.348
Control	A9	9a	27.54	0.36	27.36	-0.265	27.4925	0.231	0.2395
Control	B9	9a	27.18					0.289
Control	A10	9b	27.58	-0.09	27.625			0.225
Control	B10	9b	27.67					0.213
Restriction	C9	10a	26.68	-0.17	26.765	-0.935	27.2325	0.392	0.29075
Restriction	D9	10a	26.85					0.353
Restriction	C10	10b	27.66	-0.08	27.7			0.214
Restriction	D10	10b	27.74					0.204
Control	E9	11a	26.68	-0.05	26.705	-0.095	26.7525	0.393	0.3765
Control	F9	11a	26.73					0.382
Control	E10	11b	26.78	-0.04	26.8			0.37
Control	F10	11b	26.82					0.361
Restriction	G9	12a	27.98	-0.07	28.015	-0.265	28.1475	0.176	0.1595
Restriction	H9	12a	28.05					0.169
Restriction	G10	12b	28.21	-0.14	28.28			0.153
Restriction	H10	12b	28.35					0.14
Control	I9	13a	26.68	-0.22	26.79	-0.105	26.8425	0.394	0.35675
Control	J9	13a	26.9					0.344
Control	I10	13b	26.81	-0.17	26.895			0.362
Control	J10	13b	26.98					0.327
Restriction	K9	14a	28.62	0.1	28.57	0.115	28.5125	0.118	0.1265
Restriction	L9	14a	28.52					0.126
Restriction	K10	14b	28.48	0.05	28.455			0.129
Restriction	L10	14b	28.43					0.133
Control	M9	15a	26.87	-0.11	26.925	-0.76	27.305	0.348	0.274
Control	N9	15a	26.98					0.327
Control	M10	15b	27.71	0.05	27.685			0.207
Control	N10	15b	27.66					0.214
Restriction	O9	16a	28.96	2.27	27.825	0.805	27.4225	0.0959	0.280975
Restriction	P9	16a	26.69					0.39
Restriction	O10	16b	27.05	0.06	27.02			0.313
Restriction	P10	16b	26.99					0.325

## Sheet: PEPCK
Manip Luis.P_ShrimpDay3_Trial 4_RT19/07/2017_Mélanie SERUSIER
Gene PEPCK
Pos	Name	Cp	Diff	Mean	SD		Position	Name	Ct
G3	D20	21.99	0.23	22.1233	-1.08167		A3	bADN
G4	D20					30.62	B3	bADN	40
H3	D20	22.16					E3	bPCR
H4	D20	22.22					F3	bPCR
I3	D40	23.07	0.21	23.205	-1.1275		C3	bRT
I4	D40	23.25					D3	bRT
J3	D40	23.22
J4	D40	23.28					Error	0.0174
K3	D80	24.19	0.26	24.3325	-1.0775		Efficiency	1.894
K4	D80	24.41					Link	0
L3	D80	24.28
L4	D80	24.45
M3	D160	25.16	0.34	25.41	-1.0675
M4	D160	25.48
N3	D160	25.5
N4	D160	25.5
O3	D320	26.45	0.13	26.4775
O4	D320	26.43
P3	D320	26.47
P4	D320	26.56
Conditions	Position	Name	Ct	Diff Ct	Mean Ct	Concentration	Mean
Control	A1	1a	23.03	0.39	22.835	0.581	0.6625
Control	B1	1b	22.64			0.744
Restriction	C1	2a	23.53	-0.01	23.535	0.422	0.421
Restriction	D1	2b	23.54			0.42
Control	E1	3a	24.55	1.05	24.025	0.219	0.3245
Control	F1	3b	23.5			0.43
Restriction	G1	4a	23.66	-1.47	24.395	0.387	0.2685
Restriction	H1	4b	25.13			0.15
Control	I1	5a	25.24	1.33	24.575	0.141	0.236
Control	J1	5b	23.91			0.331
Restriction	K1	6a	24.34	-0.29	24.485	0.25	0.229
Restriction	L1	6b	24.63			0.208
Control	M1	7a	24.7	-1.64	25.52	0.199	0.1342
Control	N1	7b	26.34			0.0694
Restriction	O1	8a	23.78	-0.12	23.84	0.359	0.346
Restriction	P1	8b	23.9			0.333
Control	A2	9a	24.3	0.03	24.285	0.257	0.2595
Control	B2	9b	24.27			0.262
Restriction	C2	10a	23.97	-1.07	24.505	0.319	0.2395
Restriction	D2	10b	25.04			0.16
Control	E2	11a	25.08	-0.34	25.25	0.156	0.1405
Control	F2	11b	25.42			0.125
Restriction	G2	12a	25.5	-0.38	25.69	0.119	0.10625
Restriction	H2	12b	25.88			0.0935
Control	I2	13a	23.73	-0.22	23.84	0.37	0.3465
Control	J2	13b	23.95			0.323
Restriction	K2	14a	25.04	0.33	24.875	0.16	0.1785
Restriction	L2	14b	24.71			0.197
Control	M2	15a	25.94	-1.12	26.5	0.0895	0.06665
Control	N2	15b	27.06			0.0438
Restriction	O2	16a	23.82	-0.67	24.155	0.35	0.289
Restriction	P2	16b	24.49			0.228

## Sheet: FBP
Manip Luis.P_ShrimpDay3_Trial 4_RT19/07/2017_Mélanie SERUSIER
Gene FBP
Pos	Name	Cp	Diff	Mean	SD		Position	Name	Ct
G7	D20	22.32	0.28	22.4875	-1.065		A7	bADN
G8	D20	22.49					B7	bADN
H7	D20	22.54					E7	bPCR
H8	D20	22.6					F7	bPCR
I7	D40	23.52	0.09	23.5525	-1.035		C7	bRT
I8	D40	23.52					D7	bRT
J7	D40	23.56
J8	D40	23.61					Error	0.0073
K7	D80	24.58	0.1	24.5875	-1.0275		Efficiency	1.971
K8	D80	24.53					Link	0
L7	D80	24.61
L8	D80	24.63
M7	D160	25.59	0.13	25.615	-0.98
M8	D160	25.56
N7	D160	25.62
N8	D160	25.69
O7	D320	26.49	0.21	26.595
O8	D320
P7	D320	26.7
P8	D320
Conditions	Position	Name	Ct	Diff Ct	Mean Ct	Concentration	Mean
Control	A5	1a	24.55	0.26	24.42	0.253	0.2775
Control	B5	1b	24.29			0.302
Restriction	C5	2a	23.92	-0.12	23.98	0.39	0.3745
Restriction	D5	2b	24.04			0.359
Control	E5	3a	24.77	0.95	24.295	0.218	0.3175
Control	F5	3b	23.82			0.417
Restriction	G5	4a	24.15	-0.97	24.635	0.333	0.2525
Restriction	H5	4b	25.12			0.172
Control	I5	5a	24.66	0.85	24.235	0.235	0.327
Control	J5	5b	23.81			0.419
Restriction	K5	6a	24.43	-0.11	24.485	0.274	0.2645
Restriction	L5	6b	24.54			0.255
Control	M5	7a	24.12	-1.2	24.72	0.34	0.245
Control	N5	7b	25.32			0.15
Restriction	O5	8a	24.19	0.03	24.175	0.323	0.327
Restriction	P5	8b	24.16			0.331
Control	A6	9a	23.82	-0.15	23.895	0.417	0.397
Control	B6	9b	23.97			0.377
Restriction	C6	10a	24.58	-0.9	25.03	0.248	0.1915
Restriction	D6	10b	25.48			0.135
Control	E6	11a	24.5	-0.07	24.535	0.262	0.256
Control	F6	11b	24.57			0.25
Restriction	G6	12a	25.12	-0.44	25.34	0.172	0.15
Restriction	H6	12b	25.56			0.128
Control	I6	13a	23.71	-0.11	23.765	0.449	0.4325
Control	J6	13b	23.82			0.416
Restriction	K6	14a	25.43	0.45	25.205	0.139	0.164
Restriction	L6	14b	24.98			0.189
Control	M6	15a	27.23	-1.48	27.97	0.0411	0.0281
Control	N6	15b	28.71			0.0151
Restriction	O6	16a	23.76	-0.19	23.855	0.433	0.4075
Restriction	P6	16b	23.95			0.382

## Sheet: LDH
Manip Luis.P_ShrimpDay3_Trial 4_RT19/07/2017_Mélanie SERUSIER
Gene LDH
Pos	Name	Cp	Diff	Mean	SD		Position	Name	Ct
G11	D20	24.56	0.04	24.5625	-1.0675		A11	bADN
G12	D20	24.55					B11	bADN
H11	D20	24.55					E11	bPCR
H12	D20	24.59					F11	bPCR
I11	D40	25.61	0.07	25.63	-1.0675		C11	bRT	40
I12	D40	25.61					D11	bRT
J11	D40	25.62
J12	D40	25.68					Error	0.00651
K11	D80	26.61	0.16	26.6975	-1.035		Efficiency	1.926
K12	D80	26.77					Link	0
L11	D80	26.71
L12	D80	26.7
M11	D160	27.68	0.16	27.7325	-1.05417
M12	D160	27.66
N11	D160	27.77
N12	D160	27.82
O11	D320	28.79	0.21	28.7867
O12	D320	28.68
P11	D320	28.89
P12	D320					30.57
Conditions	Position	Name	Ct	Diff Ct	Mean Ct	Concentration	Mean
Control	A9	1a	26.79	0.18	26.7	0.233	0.248
Control	B9	1b	26.61			0.263
Restriction	C9	2a	26.25	-0.05	26.275	0.332	0.3265
Restriction	D9	2b	26.3			0.321
Control	E9	3a	26.91	1	26.41	0.217	0.315
Control	F9	3b	25.91			0.413
Restriction	G9	4a	25.97	-1.52	26.73	0.398	0.273
Restriction	H9	4b	27.49			0.148
Control	I9	5a	26.66	1.17	26.075	0.255	0.4005
Control	J9	5b	25.49			0.546
Restriction	K9	6a	26.56	-0.17	26.645	0.273	0.2585
Restriction	L9	6b	26.73			0.244
Control	M9	7a	26	-1.84	26.92	0.391	0.2545
Control	N9	7b	27.84			0.118
Restriction	O9	8a	26.22	0.01	26.215	0.34	0.341
Restriction	P9	8b	26.21			0.342
Control	A10	9a	26.14	-0.19	26.235	0.357	0.336
Control	B10	9b	26.33			0.315
Restriction	C10	10a	26.89	-0.99	27.385	0.22	0.1675
Restriction	D10	10b	27.88			0.115
Control	E10	11a	26.27	-0.22	26.38	0.328	0.306
Control	F10	11b	26.49			0.284
Restriction	G10	12a	27.64	-0.54	27.91	0.135	0.11485
Restriction	H10	12b	28.18			0.0947
Control	I10	13a	25.88	-0.19	25.975	0.423	0.398
Control	J10	13b	26.07			0.373
Restriction	K10	14a	27.77	0.26	27.64	0.124	0.135
Restriction	L10	14b	27.51			0.146
Control	M10	15a	28.94	-1.37	29.625	0.058	0.0409
Control	N10	15b	30.31			0.0238
Restriction	O10	16a	26.17	-0.44	26.39	0.349	0.3065
Restriction	P10	16b	26.61			0.264

## Sheet: PK non exploit
Manip Luis.P_ShrimpDay3_Trial 4_RT19/07/2017_Mélanie SERUSIER
Gene PK
Pos	Name	Cp	Diff	Mean	SD		Position	Name	Ct
G15	D20	22.07	0.08	22.035	-1.0525		A15	bADN
G16	D20	21.99					B15	bADN
H15	D20	22.02					E15	bPCR	40
H16	D20	22.06					F15	bPCR
I15	D40	23.12	0.08	23.0875	-1.0625		C15	bRT	40
I16	D40	23.04					D15	bRT	40
J15	D40	23.08
J16	D40	23.11					Error	0.00912
K15	D80	24.06	0.15	24.15	-1.0275		Efficiency	1.954
K16	D80	24.16					Link	0
L15	D80	24.17
L16	D80	24.21
M15	D160	25.19	0.13	25.1775	-1.02917
M16	D160	25.13
N15	D160	25.13
N16	D160	25.26
O15	D320	26.1	0.24	26.2067
O16	D320	26.18
P15	D320	26.34
P16	D320					25.59
Conditions	Position	Name	Ct	Diff Ct	Mean Ct	Concentration	Mean	Moyenne control	Moyenne res
Control	A13	1a	24.3	1.5	23.55	0.222	0.417	24.3144	24.0131
Control	B13	1b	22.8			0.612
Restriction	C13	2a	23.86	0.96	23.38	0.299	0.4345
Restriction	D13	2b	22.9			0.57
Control	E13	3a	24.2	1.7	24.2	0.236	0.236
Control	F13	3b						22.5	0.745
Restriction	G13	4a	23.58	-0.33	23.745	0.361	0.3245
Restriction	H13	4b	23.91			0.288
Control	I13	5a	24.44	1.73	24.44	0.202	0.202
Control	J13	5b						22.71	0.651
Restriction	K13	6a	23.95	0.8	23.55	0.28	0.3805
Restriction	L13	6b	23.15			0.481
Control	M13	7a	23.68	-0.57	23.965	0.336	0.283
Control	N13	7b	24.25			0.23
Restriction	O13	8a	23.78	0.79	23.385	0.315	0.425
Restriction	P13	8b	22.99			0.535
Control	A14	9a	23.72	-0.17	23.805	0.329	0.3105
Control	B14	9b	23.89			0.292
Restriction	C14	10a	23.97	-0.99	24.465	0.278	0.21
Restriction	D14	10b	24.96			0.142
Control	E14	11a	23.82	-0.12	23.88	0.307	0.2945
Control	F14	11b	23.94			0.282
Restriction	G14	12a	24.84	-0.32	25	0.154	0.139
Restriction	H14	12b	25.16			0.124
Control	I14	13a	23.46	-0.11	23.515	0.391	0.377
Control	J14	13b	23.57			0.363
Restriction	K14	14a	24.94	0.12	24.88	0.144	0.15
Restriction	L14	14b	24.82			0.156
Control	M14	15a	26.57	-1.18	27.16	0.0477	0.03465
Control	N14	15b	27.75			0.0216
Restriction	O14	16a	23.51	-0.38	23.7	0.379	0.3355
Restriction	P14	16b	23.89			0.292

## Sheet: PK (2)
Manip Luis.P_ShrimpDay3_Trial 4_RT19/07/2017_Mélanie SERUSIER
Gene PK (2)
Pos	Name	Cp	Diff	Mean	SD		Position	Name	Ct
G7	D20	22.07	0.05	22.0975	-1.11		A7	bADN
G8	D20	22.12					B7	bADN
H7	D20	22.11					E7	bPCR
H8	D20	22.09					F7	bPCR
I7	D40	23.12	0.2	23.2075	-1.04		C7	bRT
I8	D40	23.14					D7	bRT	38.31
J7	D40	23.25
J8	D40	23.32					Error
K7	D80	24.23	0.17	24.2475	-1.1975		Efficiency
K8	D80	24.16					Link
L7	D80	24.27
L8	D80	24.33
M7	D160	25.31	0.24	25.445	-0.841667
M8	D160	25.55
N7	D160	25.49
N8	D160	25.43
O7	D320	26.22	0.11	26.2867
O8	D320	26.31
P7	D320	26.33
P8	D320
Conditions	Position	Name	Ct	Diff Ct	Mean Ct	Concentration	Mean
Control	A5	1a	24.04	0.26	23.91	0.296	0.322
Control	B5	1b	23.78			0.348
Restriction	C5	2a	23.96	0.1	23.91	0.31	0.3205
Restriction	D5	2b	23.86			0.331
Control	E5	3a	24.65	1.17	24.065	0.203	0.311
Control	F5	3b	23.48			0.419
Restriction	G5	4a	23.81	-1.09	24.355	0.341	0.257
Restriction	H5	4b	24.9			0.173
Control	I5	5a	24.65	0.98	24.16	0.203	0.288
Control	J5	5b	23.67			0.373
Restriction	K5	6a	24.22	0.12	24.16	0.265	0.2755
Restriction	L5	6b	24.1			0.286
Control	M5	7a	23.9	-1.3	24.55	0.323	0.2335
Control	N5	7b	25.2			0.144
Restriction	O5	8a	23.95	0.01	23.945	0.313	0.314
Restriction	P5	8b	23.94			0.315
Control	A6	9a	23.97	-0.21	24.075	0.309	0.29
Control	B6	9b	24.18			0.271
Restriction	C6	10a	24.17	-1.01	24.675	0.273	0.209
Restriction	D6	10b	25.18			0.145
Control	E6	11a	24.17	-0.11	24.225	0.273	0.2635
Control	F6	11b	24.28			0.254
Restriction	G6	12a	25.13	-0.15	25.205	0.15	0.1435
Restriction	H6	12b	25.28			0.137
Control	I6	13a	23.67	-0.28	23.81	0.373	0.3425
Control	J6	13b	23.95			0.312
Restriction	K6	14a	25.19	0.26	25.06	0.144	0.157
Restriction	L6	14b	24.93			0.17
Control	M6	15a	26.77	26.77	26.77	0.0384	0.0384
Control	N6	15b
Restriction	O6	16a	23.6	-0.57	23.885	0.389	0.3315
Restriction	P6	16b	24.17			0.274

## Sheet: HK
Manip Luis.P_ShrimpDay3_Trial 4_RT19/07/2017_Mélanie SERUSIER
Gene HK
Pos	Name	Cp	Diff	Mean	SD		Position	Name	Ct
G19	D20	24.59	0.08	24.5975	-1.015		A19	bADN
G20	D20	24.65					B19	bADN
H19	D20	24.57					E19	bPCR
H20	D20	24.58					F19	bPCR
I19	D40	25.59	0.2	25.6125	-1.07		C19	bRT
I20	D40	25.64					D19	bRT
J19	D40	25.51
J20	D40	25.71					Error	0.0085
K19	D80	26.63	0.1	26.6825	-1.015		Efficiency	1.963
K20	D80	26.7					Link	0
L19	D80	26.67
L20	D80	26.73
M19	D160	27.67	0.22	27.6975	-0.995833
M20	D160	27.63
N19	D160	27.64
N20	D160	27.85
O19	D320	28.7	0.2	28.6933
O20	D320	28.79
P19	D320	28.59
P20	D320					27.5
Conditions	Position	Name	Ct	Diff Ct	Mean Ct	Concentration	Mean
Control	A17	1a	26.15	0.51	25.895	0.354	0.425
Control	B17	1b	25.64			0.496
Restriction	C17	2a	25.97	-0.76	26.35	0.398	0.3195
Restriction	D17	2b	26.73			0.241
Control	E17	3a	26.93	0.65	26.605	0.211	0.2675
Control	F17	3b	26.28			0.324
Restriction	G17	4a	26.44	-1.2	27.04	0.291	0.2115
Restriction	H17	4b	27.64			0.132
Control	I17	5a	27.14	0.53	26.875	0.184	0.223
Control	J17	5b	26.61			0.262
Restriction	K17	6a	26.55	-0.07	26.585	0.272	0.2655
Restriction	L17	6b	26.62			0.259
Control	M17	7a	26.1	-2.16	27.18	0.365	0.2265
Control	N17	7b	28.26			0.088
Restriction	O17	8a	26.49	0.02	26.48	0.283	0.285
Restriction	P17	8b	26.47			0.287
Control	A18	9a	25.96	0.01	25.955	0.402	0.4035
Control	B18	9b	25.95			0.405
Restriction	C18	10a	26.66	-0.86	27.09	0.253	0.198
Restriction	D18	10b	27.52			0.143
Control	E18	11a	26.84	-0.02	26.85	0.225	0.223
Control	F18	11b	26.86			0.221
Restriction	G18	12a	26.75	-0.27	26.885	0.239	0.2195
Restriction	H18	12b	27.02			0.2
Control	I18	13a	25.95	-0.12	26.01	0.405	0.389
Control	J18	13b	26.07			0.373
Restriction	K18	14a	27.17	0.27	27.035	0.181	0.1985
Restriction	L18	14b	26.9			0.216
Control	M18	15a	29.49	-1.27	30.125	0.0389	0.02785
Control	N18	15b	30.76			0.0168
Restriction	O18	16a	26.01	-0.11	26.065	0.387	0.374
Restriction	P18	16b	26.12			0.361

## Sheet: COXa
Manip Luis.P_ShrimpDay3_Trial 4_RT19/07/2017_Mélanie SERUSIER
Gene COXa
Pos	Name	Cp	Diff	Mean	SD		Position	Name	Ct
G23	D20	23.19	0.32	23.36	-1.1475		A23	bADN
G24	D20	23.3					B23	bADN
H23	D20	23.44					E23	bPCR
H24	D20	23.51					F23	bPCR
I23	D40	24.31	0.29	24.5075	-1.115		C23	bRT
I24	D40	24.54					D23	bRT	38.25
J23	D40	24.6
J24	D40	24.58					Error	0.0162
K23	D80	25.47	0.25	25.6225	-1.0675		Efficiency	1.883
K24	D80	25.63					Link	0
L23	D80	25.72
L24	D80	25.67
M23	D160	26.57	0.22	26.69	-1.0875
M24	D160	26.79
N23	D160	26.69
N24	D160	26.71
O23	D320	27.67	0.21	27.7775
O24	D320	27.88
P23	D320	27.77
P24	D320	27.79
Conditions	Position	Name	Ct	Diff Ct	Mean Ct	Concentration	Mean
Control	A21	1a	25.05	0.11	24.995	0.357	0.3695
Control	B21	1b	24.94			0.382
Restriction	C21	2a	25.13	-0.05	25.155	0.34	0.3335
Restriction	D21	2b	25.18			0.327
Control	E21	3a	25.73	0.97	25.245	0.231	0.33
Control	F21	3b	24.76			0.429
Restriction	G21	4a	24.91	-1.19	25.505	0.39	0.2865
Restriction	H21	4b	26.1			0.183
Control	I21	5a	25.51	0.51	25.255	0.266	0.3165
Control	J21	5b	25			0.367
Restriction	K21	6a	25.17	-0.42	25.38	0.33	0.292
Restriction	L21	6b	25.59			0.254
Control	M21	7a	24.73	-1.77	25.615	0.437	0.29
Control	N21	7b	26.5			0.143
Restriction	O21	8a	24.98	-0.28	25.12	0.372	0.342
Restriction	P21	8b	25.26			0.312
Control	A22	9a	25.23	-0.22	25.34	0.317	0.2965
Control	B22	9b	25.45			0.276
Restriction	C22	10a	25.63	-1	26.13	0.247	0.189
Restriction	D22	10b	26.63			0.131
Control	E22	11a	25.31	-0.18	25.4	0.302	0.286
Control	F22	11b	25.49			0.27
Restriction	G22	12a	26.01	-0.6	26.31	0.194	0.1635
Restriction	H22	12b	26.61			0.133
Control	I22	13a	24.61	-0.26	24.74	0.472	0.4365
Control	J22	13b	24.87			0.401
Restriction	K22	14a	26.62	0.38	26.43	0.132	0.15
Restriction	L22	14b	26.24			0.168
Control	M22	15a	27.79	-1.66	28.62	0.0628	0.0424
Control	N22	15b	29.45			0.022
Restriction	O22	16a	24.59	-0.63	24.905	0.476	0.398
Restriction	P22	16b	25.22			0.32

## Sheet: COXb
Manip Luis.P_ShrimpDay3_Trial 4_RT19/07/2017_Mélanie SERUSIER
Gene COXb
Pos	Name	Cp	Diff	Mean	SD		Position	Name	Ct
G3	D20	23.46	0.5	23.4525	-0.93		A3	bADN
G4	D20	23.71					B3	bADN
H3	D20	23.21					E3	bPCR
H4	D20	23.43					F3	bPCR
I3	D40	24.32	0.3	24.3825	-1.11		C3	bRT
I4	D40	24.51					D3	bRT
J3	D40	24.21
J4	D40	24.49					Error	0.0104
K3	D80	25.45	0.1	25.4925	-1.0325		Efficiency	1.956
K4	D80	25.5					Link	0
L3	D80	25.47
L4	D80	25.55
M3	D160	26.53	0.1	26.525	-1.05167
M4	D160	26.48
N3	D160	26.51
N4	D160	26.58
O3	D320	27.54	0.1	27.5767
O4	D320	27.64
P3	D320	27.55
P4	D320
Conditions	Position	Name	Ct	Diff Ct	Mean Ct	Concentration	Mean
Control	A1	1a	24.99	0.31	24.835	0.347	0.3875
Control	B1	1b	24.68			0.428
Restriction	C1	2a	25.07	0.12	25.01	0.33	0.343
Restriction	D1	2b	24.95			0.356
Control	E1	3a	25.6	1.29	24.955	0.231	0.389
Control	F1	3b	24.31			0.547
Restriction	G1	4a	24.87	-1.25	25.495	0.377	0.27
Restriction	H1	4b	26.12			0.163
Control	I1	5a	25.61	1.51	24.855	0.23	0.43
Control	J1	5b	24.1			0.63
Restriction	K1	6a	25.46	0.14	25.39	0.253	0.266
Restriction	L1	6b	25.32			0.279
Control	M1	7a	24.89	-1.01	25.395	0.371	0.2795
Control	N1	7b	25.9			0.188
Restriction	O1	8a	24.98	-0.09	25.025	0.349	0.3385
Restriction	P1	8b	25.07			0.328
Control	A2	9a	25.04	0.05	25.015	0.336	0.341
Control	B2	9b	24.99			0.346
Restriction	C2	10a	25.6	-0.55	25.875	0.23	0.1945
Restriction	D2	10b	26.15			0.159
Control	E2	11a	25.18	-0.26	25.31	0.307	0.282
Control	F2	11b	25.44			0.257
Restriction	G2	12a	25.84	-0.42	26.05	0.196	0.172
Restriction	H2	12b	26.26			0.148
Control	I2	13a	24.64	-0.23	24.755	0.438	0.407
Control	J2	13b	24.87			0.376
Restriction	K2	14a	26.14	0.36	25.96	0.161	0.1825
Restriction	L2	14b	25.78			0.204
Control	M2	15a	27.6	-0.46	27.83	0.0601	0.05215
Control	N2	15b	28.06			0.0442
Restriction	O2	16a	24.56	-0.67	24.895	0.462	0.379
Restriction	P2	16b	25.23			0.296

[truncated: 19 more sheets: COXc, ATPb, ATPa, ATPa (2), GLUT2, GLUT2 (2), GLUT1, GDH, GS, CHYTRY, LIPASE, TRYP, TRYP (2), AMY, CHH, FAS, Analyzes stats, Plan2, Plan3]
