# Supplementary material for: Long-term impact of a 4-day feed restriction at the protozoea stage on metabolic gene expressions of whiteleg shrimp (Litopenaeus vannamei)
Source: PeerJ. 2020 Mar 20;8:e8715. doi: 10.7717/peerj.8715 (PMC7087488; doi:10.7717/peerj.8715)
Supplement: Supplemental Information 2 [file peerj-08-8715-s002.xlsx]

## Sheet: EF1 RT230817
Manip Luis.P_ShrimpDay25_Trial 4_RT23/08/2017_Mélanie SERUSIER
Gene EF1
Pos	Name	Cp	Diff	Mean	SD		Position	Name	Ct
G5	D20	17.08	0.17	17.19	1.0775		A5	bADN	32.27
G6	D20	17.21					B5	bADN	31.51
H5	D20	17.25					E5	bPCR	36.83
H6	D20	17.22					F5	bPCR	33.25
I5	D40	18.17	0.17	18.2675	1.13		C5	bRT
I6	D40	18.26					D5	bRT	35.9
J5	D40	18.34
J6	D40	18.3					Error	0.00756
K5	D80	19.25	0.21	19.3975	1.1075		Efficiency	1.873
K6	D80	19.44					Link	0
L5	D80	19.46
L6	D80	19.44
M5	D160	20.45	0.09	20.505	0.995
M6	D160	20.51
N5	D160	20.54
N6	D160	20.52
O5	D320	21.49	0.06	21.5
O6	D320	21.49
P5	D320	21.48
P6	D320	21.54
Conditions	Position	Name	Ct	Diff Ct	Mean Ct	SD	Mean CT	Concentration	Mean
Control	A1	1a	19.19	-0.02	19.2	-0.19	19.295	0.287	0.27
Control	B1	1a	19.21					0.285
Control	A2	1b	19.32	-0.14	19.39			0.266
Control	B2	1b	19.46					0.242
Restriction	C1	2a	19.74	-0.08	19.78	-0.475	20.0175	0.203	0.176
Restriction	D1	2a	19.82					0.194
Restriction	C2	2b	19.8	-0.91	20.255			0.196
Restriction	D2	2b	20.71					0.111
Control	E1	3a	18.69	-0.03	18.705	-0.055	18.7325	0.394	0.38325
Control	F1	3a	18.72					0.386
Control	E2	3b	18.75	-0.02	18.76			0.379
Control	F2	3b	18.77					0.374
Restriction	G1	4a	19.12	-0.16	19.2	-0.11	19.255	0.301	0.27675
Restriction	H1	4a	19.28					0.271
Restriction	G2	4b	19.28	-0.06	19.31			0.272
Restriction	H2	4b	19.34					0.263
Control	I1	5a	19.32	-0.14	19.39	-0.07	19.425	0.266	0.24875
Control	J1	5a	19.46					0.243
Control	I2	5b	19.43	-0.06	19.46			0.248
Control	J2	5b	19.49					0.238
Restriction	K1	6a	18.62	-0.08	18.66	-0.08	18.7	0.411	0.39125
Restriction	L1	6a	18.7					0.391
Restriction	K2	6b	18.71	-0.06	18.74			0.389
Restriction	L2	6b	18.77					0.374
Control	M1	7a	19.21	-0.07	19.245	0.02	19.235	0.284	0.2795
Control	N1	7a	19.28					0.271
Control	M2	7b	19.23	0.01	19.225			0.28
Control	N2	7b	19.22					0.283
Restriction	O1	8a	19.03	-0.07	19.065	-0.075	19.1025	0.319	0.30425
Restriction	P1	8a	19.1					0.304
Restriction	O2	8b	19.14	0	19.14			0.297
Restriction	P2	8b	19.14					0.297
Control	A3	9a	19.35	-0.1	19.4	-0.04	19.42	0.261	0.24925
Control	B3	9a	19.45					0.244
Control	A4	9b	19.45	0.02	19.44			0.244
Control	B4	9b	19.43					0.248
Restriction	C3	10a	19.1	-0.04	19.12	-0.02	19.13	0.305	0.29875
Restriction	D3	10a	19.14					0.296
Restriction	C4	10b	19.11	-0.06	19.14			0.303
Restriction	D4	10b	19.17					0.291
Control	E3	11a	19.98	-0.05	20.005	-0.01	20.01	0.175	0.172
Control	F3	11a	20.03					0.17
Control	E4	11b	19.99	-0.05	20.015			0.174
Control	F4	11b	20.04					0.169
Restriction	G3	12a	19.01	-0.05	19.035	-0.075	19.0725	0.323	0.31025
Restriction	H3	12a	19.06					0.313
Restriction	G4	12b	19.09	-0.04	19.11			0.306
Restriction	H4	12b	19.13					0.299
Control	I3	13a	19.33	-0.13	19.395	-0.075	19.4325	0.264	0.2475
Control	J3	13a	19.46					0.243
Control	I4	13b	19.45	-0.04	19.47			0.245
Control	J4	13b	19.49					0.238
Restriction	K3	14a	19.68	-0.06	19.71	0.01	19.705	0.211	0.20775
Restriction	L3	14a	19.74					0.203
Restriction	K4	14b	19.69	-0.02	19.7			0.21
Restriction	L4	14b	19.71					0.207
Control	M3	15a	19.1	-0.14	19.17	0.03	19.155	0.305	0.2945
Control	N3	15a	19.24					0.279
Control	M4	15b	19.11	-0.06	19.14			0.303
Control	N4	15b	19.17					0.291
Restriction	O3	16a	19.49	-0.1	19.54	-0.055	19.5675	0.239	0.2275
Restriction	P3	16a	19.59					0.225
Restriction	O4	16b	19.56	-0.07	19.595			0.228
Restriction	P4	16b	19.63					0.218

## Sheet: Lucif RT230817
Manip Luis.P_ShrimpDay25_Trial 4_RT23/08/2017_Mélanie SERUSIER
Gene Luciferase
Pos	Name	Cp	Diff	Mean	SD		Position	Name	Ct
G11	D20	24.74	0.6	25.0767	0.926667		A11	bADN	37.88
G12	D20						B11	bADN	36.88
H11	D20	25.15					E11	bPCR	38.41
H12	D20	25.34					F11	bPCR	36.16
I11	D40	25.8	0.36	26.0033	1.1		C11	bRT	37.32
I12	D40						D11	bRT	36.74
J11	D40	26.05
J12	D40	26.16					Error	0.0267
K11	D80	26.85	0.4	27.1033	1.04		Efficiency	2.012
K12	D80						Link	0
L11	D80	27.21
L12	D80	27.25
M11	D160	27.84	0.61	28.1433	1.05667
M12	D160
N11	D160	28.14
N12	D160	28.45
O11	D320	29.07	0.41	29.2
O12	D320
P11	D320	29.47
P12	D320	29.06
Conditions	Position	Name	Ct	Diff Ct	Mean Ct	SD	Mean CT	Concentration	Mean
Control	A7	1a	27.21	0.14	27.14	-0.255	27.2675	0.236	0.2275
Control	B7	1a	27.07					0.259
Control	A8	1b	27.5	0.21	27.395			0.192
Control	B8	1b	27.29					0.223
Restriction	C7	2a	26.78	-0.13	26.845	0.01	26.84	0.319	0.306
Restriction	D7	2a	26.91					0.29
Restriction	C8	2b	26.92	0.17	26.835			0.289
Restriction	D8	2b	26.75					0.326
Control	E7	3a	27.23	0.01	27.225	-0.04	27.245	0.232	0.22975
Control	F7	3a	27.22					0.234
Control	E8	3b	27.2	-0.13	27.265			0.237
Control	F8	3b	27.33					0.216
Restriction	G7	4a	27.01	-0.11	27.065	-0.13	27.13	0.271	0.25
Restriction	H7	4a	27.12					0.252
Restriction	G8	4b	27.16	-0.07	27.195			0.244
Restriction	H8	4b	27.23					0.233
Control	I7	5a	27.03	-0.08	27.07	-0.04	27.09	0.267	0.2565
Control	J7	5a	27.11					0.253
Control	I8	5b	27.15	0.08	27.11			0.246
Control	J8	5b	27.07					0.26
Restriction	K7	6a	27.03	-0.15	27.105	0.015	27.0975	0.268	0.255
Restriction	L7	6a	27.18					0.241
Restriction	K8	6b	27.06	-0.06	27.09			0.261
Restriction	L8	6b	27.12					0.25
Control	M7	7a	27.19	-0.34	27.36	0.085	27.3175	0.238	0.2195
Control	N7	7a	27.53					0.188
Control	M8	7b	27.27	-0.01	27.275			0.227
Control	N8	7b	27.28					0.225
Restriction	O7	8a	26.88	-0.04	26.9	-0.375	27.0875	0.296	0.25925
Restriction	P7	8a	26.92					0.288
Restriction	O8	8b	27.42	0.29	27.275			0.203
Restriction	P8	8b	27.13					0.25
Control	A9	9a	27.18	0.01	27.175	-0.035	27.1925	0.24	0.23825
Control	B9	9a	27.17					0.242
Control	A10	9b	27.1	-0.22	27.21			0.254
Control	B10	9b	27.32					0.217
Restriction	C9	10a	27.08	-0.08	27.12	-0.19	27.215	0.258	0.2355
Restriction	D9	10a	27.16					0.244
Restriction	C10	10b	27.2	-0.22	27.31			0.237
Restriction	D10	10b	27.42					0.203
Control	E9	11a	27.11	0.05	27.085	-0.065	27.1175	0.252	0.2515
Control	F9	11a	27.06					0.262
Control	E10	11b	27.09	-0.12	27.15			0.257
Control	F10	11b	27.21					0.235
Restriction	G9	12a	27.16	0.21	27.055	0.08	27.015	0.243	0.27025
Restriction	H9	12a	26.95					0.282
Restriction	G10	12b	26.91	-0.13	26.975			0.291
Restriction	H10	12b	27.04					0.265
Control	I9	13a	27.1	-0.01	27.105	-0.095	27.1525	0.254	0.2455
Control	J9	13a	27.11					0.253
Control	I10	13b	27.12	-0.16	27.2			0.251
Control	J10	13b	27.28					0.224
Restriction	K9	14a	27.43	0.08	27.39	0.095	27.3425	0.202	0.216
Restriction	L9	14a	27.35					0.214
Restriction	K10	14b	27.11	-0.37	27.295			0.253
Restriction	L10	14b	27.48					0.195
Control	M9	15a	27.24	0.05	27.215	-0.005	27.2175	0.231	0.234
Control	N9	15a	27.19					0.238
Control	M10	15b	27.22	0	27.22			0.234
Control	N10	15b	27.22					0.233
Restriction	O9	16a	27.03	-0.04	27.05	0.08	27.01	0.267	0.27075
Restriction	P9	16a	27.07					0.259
Restriction	O10	16b	26.99	0.04	26.97			0.274
Restriction	P10	16b	26.95					0.283

## Sheet: Stat Analyzes
Conditions	sample	EF1	Luciferase	PEPCK	PEPCK NORM	FBP	FBP NORM	LDH	LDH NORM	PK	PK NORM	HK	HK NORM	COXA	COXA NORM
Control	1	0.27	0.2275	0.1475	0.546296	0.26	0.962963	0.325	1.2037	0.2475	0.916667	0.2135	0.790741	0.2695	0.998148
Restriction	2	0.176	0.306	0.127	0.721591	0.153	0.869318	0.309	1.75568	0.2425	1.37784	0.131	0.744318	0.202	1.14773
Control	3	0.38325	0.22975	0.3245	0.846706	0.3975	1.03718	0.322	0.840183	0.3555	0.927593	0.34	0.887149	0.4035	1.05284
Restriction	4	0.27675	0.25	0.2475	0.894309	0.324	1.17073	0.226	0.816621	0.244	0.881662	0.2895	1.04607	0.2735	0.988257
Control	5	0.24875	0.2565	0.5335	2.14472	0.306	1.23015	0.19	0.763819	0.25	1.00503	0.2465	0.990955	0.2515	1.01106
Restriction	6	0.39125	0.255	0.2045	0.522684	0.3375	0.86262	0.3305	0.844728	0.327	0.835783	0.4235	1.08243	0.4175	1.06709
Control	7	0.2795	0.2195	0.241	0.862254	0.2565	0.91771	0.2495	0.892665	0.262	0.937388	0.2385	0.853309	0.2665	0.953488
Restriction	8	0.30425	0.25925	0.3965	1.3032	0.3975	1.30649	0.2395	0.787182	0.285	0.93673	0.355	1.1668	0.3325	1.09285
Control	9	0.24925	0.23825	0.2665	1.06921	0.2875	1.15346	0.153	0.613842	0.1755	0.704112	0.287	1.15145	0.2195	0.880642
Restriction	10	0.29875	0.2355	0.3085	1.03264	0.386	1.29205	0.2445	0.81841	0.2695	0.902092	0.365	1.22176	0.2745	0.918828
Control	11	0.172	0.2515	0.39	2.26744	0.136	0.790698	0.1041	0.605233	0.1735	1.00872	0.1067	0.620349	0.1965	1.14244
Restriction	12	0.31025	0.27025	0.2015	0.649476	0.2605	0.839645	0.2635	0.849315	0.2675	0.862208	0.3355	1.08139	0.318	1.02498
Control	13	0.2475	0.2455	0.2435	0.983838	0.275	1.11111	0.216	0.872727	0.239	0.965657	0.262	1.05859	0.253	1.02222
Restriction	14	0.20775	0.216	0.283	1.36221	0.273	1.31408	0.1365	0.65704	0.2055	0.98917	0.2445	1.1769	0.206	0.991576
Control	15	0.2945	0.234	0.1165	0.395586	0.2375	0.806452	0.432	1.46689	0.323	1.09677	0.228	0.774194	0.34	1.1545
Restriction	16	0.2275	0.27075	0.129	0.567033	0.183	0.804396	0.3935	1.72967	0.2665	1.17143	0.1565	0.687912	0.2465	1.08352
Conditions	sample	EF1	Luciferase	COXB	COXB NORM	COXC	COXC NORM	ATPB	ATPB NORM	ATPA	ATPANORM	GLUT2	GLUT2 NORM	GLUT1	GLUT1 NORM
Control	1	0.27	0.2275	0.2345	0.868519	0.2855	1.05741	0.31	1.14815	0.282	1.04444	0.152	0.562963	0.2155	0.798148
Restriction	2	0.176	0.306	0.1975	1.12216	0.244	1.38636	0.215	1.22159	0.21	1.19318	0.07615	0.43267	0.157	0.892045
Control	3	0.38325	0.22975	0.383	0.999348	0.405	1.05675	0.3445	0.898891	0.3775	0.984997	0.2835	0.739726	0.3315	0.864971
Restriction	4	0.27675	0.25	0.264	0.95393	0.315	1.13821	0.284	1.0262	0.2925	1.05691	0.2295	0.829268	0.262	0.946703
Control	5	0.24875	0.2565	0.2155	0.866332	0.28	1.12563	0.2015	0.81005	0.2305	0.926633	0.2225	0.894472	0.2425	0.974874
Restriction	6	0.39125	0.255	0.4045	1.03387	0.4265	1.0901	0.365	0.932907	0.387	0.989137	0.346	0.884345	0.3365	0.860064
Control	7	0.2795	0.2195	0.238	0.851521	0.2845	1.01789	0.2925	1.04651	0.254	0.908766	0.209	0.747764	0.243	0.86941
Restriction	8	0.30425	0.25925	0.303	0.995892	0.322	1.05834	0.311	1.02219	0.3115	1.02383	0.4195	1.3788	0.292	0.959737
Control	9	0.24925	0.23825	0.203	0.814443	0.23	0.922768	0.255	1.02307	0.225	0.902708	0.317	1.27182	0.2155	0.864594
Restriction	10	0.29875	0.2355	0.2675	0.895397	0.2845	0.952301	0.299	1.00084	0.2825	0.945607	0.425	1.42259	0.281	0.940586
Control	11	0.172	0.2515	0.159	0.924419	0.1925	1.11919	0.162	0.94186	0.179	1.0407	0.1595	0.927326	0.136	0.790698
Restriction	12	0.31025	0.27025	0.304	0.979855	0.303	0.976632	0.294	0.947623	0.2945	0.949234	0.289	0.931507	0.2825	0.910556
Control	13	0.2475	0.2455	0.2455	0.991919	0.2745	1.10909	0.2655	1.07273	0.251	1.01414	0.199	0.80404	0.2435	0.983838
Restriction	14	0.20775	0.216	0.207	0.99639	0.2375	1.1432	0.2055	0.98917	0.1935	0.931408	0.228	1.09747	0.232	1.11673
Control	15	0.2945	0.234	0.355	1.20543	0.3115	1.05772	0.354	1.20204	0.3315	1.12564	0.2	0.679117	0.282	0.957555
Restriction	16	0.2275	0.27075	0.25	1.0989	0.257	1.12967	0.2735	1.2022	0.26	1.14286	0.104	0.457143	0.183	0.804396
Conditions	sample	EF1	Luciferase	GDH	GDH NORM	GS	GS NORM	CHYTRY	CHYTRY NORM	LIPASE	LIPASE NORM	TRYP	TRYP NORM	AMY	AMY NORM
Control	1	0.27	0.2275	0.237	0.877778	0.268	0.992593	0.18	0.666667	0.188	0.696296	0.1625	0.601852	0.125	0.462963
Restriction	2	0.176	0.306	0.1715	0.974432	0.2305	1.30966	0.1725	0.980114	0.13	0.738636	0.199	1.13068	0.1045	0.59375
Control	3	0.38325	0.22975	0.357	0.931507	0.396	1.03327	0.296	0.772342	0.4015	1.04762	0.374	0.975864	0.525	1.36986
Restriction	4	0.27675	0.25	0.2775	1.00271	0.2705	0.977416	0.3765	1.36043	0.2755	0.995483	0.3225	1.16531	0.277	1.0009
Control	5	0.24875	0.2565	0.2505	1.00704	0.249	1.00101	0.309	1.24221	0.2965	1.19196	0.217	0.872362	0.315	1.26633
Restriction	6	0.39125	0.255	0.3575	0.913738	0.3435	0.877955	0.3165	0.808946	0.327	0.835783	0.433	1.10671	0.3965	1.01342
Control	7	0.2795	0.2195	0.2555	0.914132	0.2605	0.932021	0.245	0.876565	0.325	1.16279	0.302	1.0805	0.3905	1.39714
Restriction	8	0.30425	0.25925	0.2885	0.948233	0.3095	1.01726	0.287	0.943303	0.3175	1.04355	0.384	1.26212	0.344	1.13065
Control	9	0.24925	0.23825	0.223	0.894684	0.197	0.790371	0.244	0.978937	0.2835	1.13741	0.306	1.22768	0.2625	1.05316
Restriction	10	0.29875	0.2355	0.254	0.850209	0.2875	0.962343	0.224	0.749791	0.3255	1.08954	0.3295	1.10293	0.3035	1.0159
Control	11	0.172	0.2515	0.1825	1.06105	0.1715	0.997093	0.1305	0.758721	0.182	1.05814	0.1575	0.915698	0.1965	1.14244
Restriction	12	0.31025	0.27025	0.273	0.879936	0.2265	0.730056	0.2335	0.752619	0.2765	0.891217	0.3395	1.09428	0.282	0.908944
Control	13	0.2475	0.2455	0.239	0.965657	0.244	0.985859	0.2915	1.17778	0.2885	1.16566	0.2635	1.06465	0.34	1.37374
Restriction	14	0.20775	0.216	0.2005	0.965102	0.174	0.837545	0.3335	1.60529	0.2235	1.07581	0.1935	0.931408	0.283	1.36221
Control	15	0.2945	0.234	0.277	0.940577	0.335	1.13752	0.1675	0.568761	0.223	0.757216	0.252	0.855688	0.159	0.539898
Restriction	16	0.2275	0.27075	NA	NA	0.286	1.25714	0.186	0.817582	0.1905	0.837363	0.233	1.02418	0.1425	0.626374
Conditions	sample	EF1	Luciferase	CHH	CHH NORM	FAS	FAS NORM	ATPa (2)	ATPa (2) NOrM	GDH (2)	GDH (2) NORM	CHYTRY (2)	CHYTRY(2) NORM	AMY (2)	AMY(2) NORM
Control	1	0.27	0.2275	0.3165	1.17222	0.232	0.859259	0.2695	0.998148	0.1875	0.694444	0.1715	0.635185	0.11	0.407407
Restriction	2	0.176	0.306	0.167	0.948864	0.1265	0.71875	0.199	1.13068	0.134	0.761364	0.1575	0.894886	0.09085	0.516193
Control	3	0.38325	0.22975	0.3115	0.812785	0.381	0.994129	0.3625	0.945858	0.2995	0.781474	0.28	0.730594	0.4255	1.11024
Restriction	4	0.27675	0.25	0.3235	1.16893	0.2155	0.778681	0.2845	1.028	0.232	0.838302	0.3435	1.24119	0.2345	0.847335
Control	5	0.24875	0.2565	0.2655	1.06734	0.1715	0.689447	0.2085	0.838191	0.2165	0.870352	0.2815	1.13166	0.261	1.04925
Restriction	6	0.39125	0.255	0.497	1.27029	0.492	1.25751	0.375	0.958466	0.266	0.679872	0.2945	0.752716	0.343	0.876677
Control	7	0.2795	0.2195	0.3	1.07335	0.262	0.937388	0.238	0.851521	0.209	0.747764	0.244	0.872987	0.3475	1.24329
Restriction	8	0.30425	0.25925	0.1975	0.649137	0.4725	1.553	0.274	0.900575	0.238	0.782251	0.2875	0.944947	0.291	0.95645
Control	9	0.24925	0.23825	0.67	2.68806	0.3335	1.33801	0.2135	0.85657	0.169	0.678034	0.2255	0.904714	0.2325	0.932798
Restriction	10	0.29875	0.2355	0.2205	0.738075	0.3385	1.13305	0.273	0.913808	0.2025	0.677824	0.1985	0.664435	0.2645	0.885356
Control	11	0.172	0.2515	0.241	1.40116	0.161	0.936047	0.165	0.959302	0.1485	0.863372	0.121	0.703488	0.179	1.0407
Restriction	12	0.31025	0.27025	0.2025	0.652699	0.3445	1.11039	0.275	0.886382	0.206	0.663981	0.216	0.696213	0.241	0.776793
Control	13	0.2475	0.2455	0.2265	0.915152	0.2585	1.04444	0.253	1.02222	0.1865	0.753535	0.2625	1.06061	0.3175	1.28283
Restriction	14	0.20775	0.216	0.224	1.07822	0.2495	1.20096	0.204	0.981949	0.1765	0.849579	0.3275	1.57641	0.2425	1.16727
Control	15	0.2945	0.234	0.2405	0.816638	0.1975	0.670628	0.306	1.03905	0.2315	0.786078	0.1765	0.599321	0.15	0.509338
Restriction	16	0.2275	0.27075	0.295	1.2967	0.1765	0.775824	0.24	1.05495	0.1645	0.723077	0.1965	0.863736	0.1205	0.52967

## Sheet: Plan1
Conditions	EF1	PEPCK NORM	FBP NORM	LDH NORM	PK NORM	HK NORM	COXA NORM	COXB NORM	COXC NORM	ATPB NORM	ATPANORM	GLUT2 NORM	GLUT1 NORM	GDH NORM	GS NORM	CHYTRY NORM	LIPASE NORM	TRYP NORM	AMY NORM	CHH NORM	FAS NORM	ATPa (2) NOrM	GDH (2) NORM	CHYTRY(2) NORM	AMY(2) NORM
Control	0.27	0.546296	0.962963	1.2037	0.916667	0.790741	0.998148	0.868519	1.05741	1.14815	1.04444	0.562963	0.798148	0.877778	0.992593	0.666667	0.696296	0.601852	0.462963	1.17222	0.859259	0.998148	0.694444	0.635185	0.407407
Control	0.38325	0.846706	1.03718	0.840183	0.927593	0.887149	1.05284	0.999348	1.05675	0.898891	0.984997	0.739726	0.864971	0.931507	1.03327	0.772342	1.04762	0.975864	1.36986	0.812785	0.994129	0.945858	0.781474	0.730594	1.11024
Control	0.24875	2.14472	1.23015	0.763819	1.00503	0.990955	1.01106	0.866332	1.12563	0.81005	0.926633	0.894472	0.974874	1.00704	1.00101	1.24221	1.19196	0.872362	1.26633	1.06734	0.689447	0.838191	0.870352	1.13166	1.04925
Control	0.2795	0.862254	0.91771	0.892665	0.937388	0.853309	0.953488	0.851521	1.01789	1.04651	0.908766	0.747764	0.86941	0.914132	0.932021	0.876565	1.16279	1.0805	1.39714	1.07335	0.937388	0.851521	0.747764	0.872987	1.24329
Control	0.24925	1.06921	1.15346	0.613842	0.704112	1.15145	0.880642	0.814443	0.922768	1.02307	0.902708	1.27182	0.864594	0.894684	0.790371	0.978937	1.13741	1.22768	1.05316	2.68806	1.33801	0.85657	0.678034	0.904714	0.932798
Control	0.172	2.26744	0.790698	0.605233	1.00872	0.620349	1.14244	0.924419	1.11919	0.94186	1.0407	0.927326	0.790698	1.06105	0.997093	0.758721	1.05814	0.915698	1.14244	1.40116	0.936047	0.959302	0.863372	0.703488	1.0407
Control	0.2475	0.983838	1.11111	0.872727	0.965657	1.05859	1.02222	0.991919	1.10909	1.07273	1.01414	0.80404	0.983838	0.965657	0.985859	1.17778	1.16566	1.06465	1.37374	0.915152	1.04444	1.02222	0.753535	1.06061	1.28283
Control	0.2945	0.395586	0.806452	1.46689	1.09677	0.774194	1.1545	1.20543	1.05772	1.20204	1.12564	0.679117	0.957555	0.940577	1.13752	0.568761	0.757216	0.855688	0.539898	0.816638	0.670628	1.03905	0.786078	0.599321	0.509338
Restriction	0.176	0.721591	0.869318	1.75568	1.37784	0.744318	1.14773	1.12216	1.38636	1.22159	1.19318	0.43267	0.892045	0.974432	1.30966	0.980114	0.738636	1.13068	0.59375	0.948864	0.71875	1.13068	0.761364	0.894886	0.516193
Restriction	0.27675	0.894309	1.17073	0.816621	0.881662	1.04607	0.988257	0.95393	1.13821	1.0262	1.05691	0.829268	0.946703	1.00271	0.977416	1.36043	0.995483	1.16531	1.0009	1.16893	0.778681	1.028	0.838302	1.24119	0.847335
Restriction	0.39125	0.522684	0.86262	0.844728	0.835783	1.08243	1.06709	1.03387	1.0901	0.932907	0.989137	0.884345	0.860064	0.913738	0.877955	0.808946	0.835783	1.10671	1.01342	1.27029	1.25751	0.958466	0.679872	0.752716	0.876677
Restriction	0.30425	1.3032	1.30649	0.787182	0.93673	1.1668	1.09285	0.995892	1.05834	1.02219	1.02383	1.3788	0.959737	0.948233	1.01726	0.943303	1.04355	1.26212	1.13065	0.649137	1.553	0.900575	0.782251	0.944947	0.95645
Restriction	0.29875	1.03264	1.29205	0.81841	0.902092	1.22176	0.918828	0.895397	0.952301	1.00084	0.945607	1.42259	0.940586	0.850209	0.962343	0.749791	1.08954	1.10293	1.0159	0.738075	1.13305	0.913808	0.677824	0.664435	0.885356
Restriction	0.31025	0.649476	0.839645	0.849315	0.862208	1.08139	1.02498	0.979855	0.976632	0.947623	0.949234	0.931507	0.910556	0.879936	0.730056	0.752619	0.891217	1.09428	0.908944	0.652699	1.11039	0.886382	0.663981	0.696213	0.776793
Restriction	0.20775	1.36221	1.31408	0.65704	0.98917	1.1769	0.991576	0.99639	1.1432	0.98917	0.931408	1.09747	1.11673	0.965102	0.837545	1.60529	1.07581	0.931408	1.36221	1.07822	1.20096	0.981949	0.849579	1.57641	1.16727
Restriction	0.2275	0.567033	0.804396	1.72967	1.17143	0.687912	1.08352	1.0989	1.12967	1.2022	1.14286	0.457143	0.804396	NA	1.25714	0.817582	0.837363	1.02418	0.626374	1.2967	0.775824	1.05495	0.723077	0.863736	0.52967
Control	Mean	1.13951	1.00122	0.907383	0.945242	0.890842	1.02692	0.940242	1.05831	1.01791	0.993503	0.828403	0.888011	0.949052	0.983716	0.880248	1.02714	0.949287	1.07569	1.24334	0.93367	0.938858	0.771882	0.829819	0.946981
	SD	0.694858	0.1602	0.293954	0.113588	0.170836	0.0911706	0.12595	0.0663597	0.129763	0.0780803	0.213297	0.0760967	0.0607283	0.0976344	0.238552	0.192951	0.18718	0.374645	0.61554	0.211732	0.0806254	0.0697778	0.195908	0.322792
Restriction	Mean	0.881643	1.05742	1.03233	0.994614	1.02595	1.03935	1.00955	1.10935	1.04284	1.02902	0.929225	0.928852	0.93348	0.996172	1.00226	0.938423	1.1022	0.956519	0.975364	1.06602	0.981851	0.747031	0.954317	0.819468
	SD	0.324911	0.23317	0.442629	0.187306	0.200435	0.0726569	0.0742791	0.133299	0.109444	0.0964773	0.369416	0.0915094	0.0545867	0.199383	0.314743	0.130335	0.0968873	0.25256	0.268814	0.2893	0.084954	0.0727651	0.309935	0.215771

## Sheet: PECK
Manip Luis.P_ShrimpDay25_Trial 4_RT23/08/2017_Mélanie SERUSIER
Gene PEPCK
Pos	Name	Cp	Diff	Mean	SD		Position	Name	Ct
G3	D20	20.88	0.11	20.925	-1.1025		A3	bADN	32.09
G4	D20	20.89					B3	bADN	35.2
H3	D20	20.94					E3	bPCR
H4	D20	20.99					F3	bPCR
I3	D40	21.96	0.13	22.0275	-1.035		C3	bRT	40
I4	D40	22.09					D3	bRT
J3	D40	22.02
J4	D40	22.04					Error	0.00651
K3	D80	23	0.13	23.0625	-1.11		Efficiency	1.893
K4	D80	23.04					Link	0
L3	D80	23.08
L4	D80	23.13
M3	D160	24.09	0.12	24.1725	-1.0075
M4	D160	24.2
N3	D160	24.19
N4	D160	24.21
O3	D320	25.17	0.15	25.18
O4	D320	25.28
P3	D320	25.13
P4	D320	25.14
Conditions	Position	Name	Ct	Diff Ct	Mean Ct	Concentration	Meam
Control	A1	1a	23.83	-0.18	23.92	0.156	0.1475
Control	B1	1b	24.01			0.139
Restriction	C1	2a	24.1	-0.12	24.16	0.132	0.127
Restriction	D1	2b	24.22			0.122
Control	E1	3a	22.64	-0.1	22.69	0.335	0.3245
Control	F1	3b	22.74			0.314
Restriction	G1	4a	22.99	-0.25	23.115	0.267	0.2475
Restriction	H1	4b	23.24			0.228
Control	I1	5a	21.84	-0.13	21.905	0.556	0.5335
Control	J1	5b	21.97			0.511
Restriction	K1	6a	23.34	-0.14	23.41	0.214	0.2045
Restriction	L1	6b	23.48			0.195
Control	M1	7a	23.16	0.02	23.15	0.239	0.241
Control	N1	7b	23.14			0.243
Restriction	O1	8a	22.26	-0.23	22.375	0.425	0.3965
Restriction	P1	8b	22.49			0.368
Control	A2	9a	22.94	-0.1	22.99	0.275	0.2665
Control	B2	9b	23.04			0.258
Restriction	C2	10a	22.7	-0.13	22.765	0.321	0.3085
Restriction	D2	10b	22.83			0.296
Control	E2	11a	22.32	-0.16	22.4	0.41	0.39
Control	F2	11b	22.48			0.37
Restriction	G2	12a	23.29	-0.3	23.44	0.221	0.2015
Restriction	H2	12b	23.59			0.182
Control	I2	13a	23.01	-0.25	23.135	0.263	0.2435
Control	J2	13b	23.26			0.224
Restriction	K2	14a	22.86	-0.08	22.9	0.29	0.283
Restriction	L2	14b	22.94			0.276
Control	M2	15a	24.24	-0.09	24.285	0.12	0.1165
Control	N2	15b	24.33			0.113
Restriction	O2	16a	24.04	-0.18	24.13	0.136	0.129
Restriction	P2	16b	24.22			0.122

## Sheet: FBP
Manip Luis.P_ShrimpDay25_Trial 4_RT23/08/2017_Mélanie SERUSIER
Gene FBP
Pos	Name	Cp	Diff	Mean	SD		Position	Name	Ct
G7	D20	22.49	0.02	22.49	-1.035		A7	bADN
G8	D20	22.49					B7	bADN
H7	D20	22.5					E7	bPCR
H8	D20	22.48					F7	bPCR	23.87
I7	D40	23.53	0.08	23.525	-1.0325		C7	bRT
I8	D40	23.48					D7	bRT
J7	D40	23.53					B PCR = OK; no amplification
J8	D40	23.56					Error	0.00729
K7	D80	24.51	0.1	24.5575	-1.0875		Efficiency	1.937
K8	D80	24.61					Link	0
L7	D80	24.59
L8	D80	24.52					Considering the dillution 320
M7	D160	25.67	0.05	25.645	-0.9425		Error: 0,00168	OK
M8	D160	25.62					Efficiency: 1,937	OK
N7	D160	25.66					Link: 0,123
N8	D160	25.63
O7	D320	26.54	0.13	26.5875
O8	D320	26.67
P7	D320	26.56
P8	D320	26.58
Conditions	Position	Name	Ct	Diff Ct	Ct Mean	Concentration	Mean
Control	A5	1a	24.47	-0.1	24.52	0.269	0.26
Control	B5	1b	24.57			0.251
Restriction	C5	2a	25.2	-0.25	25.325	0.165	0.153
Restriction	D5	2b	25.45			0.141
Control	E5	3a	23.78	-0.2	23.88	0.424	0.3975
Control	F5	3b	23.98			0.371
Restriction	G5	4a	24.05	-0.29	24.195	0.354	0.324
Restriction	H5	4b	24.34			0.294
Control	I5	5a	24.12	-0.32	24.28	0.338	0.306
Control	J5	5b	24.44			0.274
Restriction	K5	6a	24.02	-0.22	24.13	0.363	0.3375
Restriction	L5	6b	24.24			0.312
Control	M5	7a	24.5	-0.08	24.54	0.263	0.2565
Control	N5	7b	24.58			0.25
Restriction	O5	8a	23.84	-0.07	23.875	0.407	0.3975
Restriction	P5	8b	23.91			0.388
Control	A6	9a	24.41	0.09	24.365	0.279	0.2875
Control	B6	9b	24.32			0.296
Restriction	C6	10a	23.89	-0.06	23.92	0.393	0.386
Restriction	D6	10b	23.95			0.379
Control	E6	11a	25.52	0.05	25.495	0.134	0.136
Control	F6	11b	25.47			0.138
Restriction	G6	12a	24.46	-0.11	24.515	0.27	0.2605
Restriction	H6	12b	24.57			0.251
Control	I6	13a	24.32	-0.24	24.44	0.297	0.275
Control	J6	13b	24.56			0.253
Restriction	K6	14a	24.43	-0.04	24.45	0.277	0.273
Restriction	L6	14b	24.47			0.269
Control	M6	15a	24.62	-0.07	24.655	0.243	0.2375
Control	N6	15b	24.69			0.232
Restriction	O6	16a	25.06	0.02	25.05	0.182	0.183
Restriction	P6	16b	25.04			0.184

## Sheet: LDH
Manip Luis.P_ShrimpDay25_Trial 4_RT23/08/2017_Mélanie SERUSIER
Gene LDH
Pos	Name	Cp	Diff	Mean	SD		Position	Name	Ct
G11	D20	22.44	0.09	22.495	-1.065		A11	bADN
G12	D20	22.48					B11	bADN
H11	D20	22.53					E11	bPCR
H12	D20	22.53					F11	bPCR	24.54
I11	D40	23.56	0.1	23.56	-1.055		C11	bRT
I12	D40	23.5					D11	bRT
J11	D40	23.58					B PCR = OK; no amplification
J12	D40	23.6					Error	0.00313
K11	D80	24.62	0.06	24.615	-1.105		Efficiency	1.916
K12	D80	24.58					Link	0
L11	D80	24.62
L12	D80	24.64
M11	D160	25.64	0.21	25.72	-1.06
M12	D160	25.66
N11	D160	25.73
N12	D160	25.85
O11	D320	26.71	0.15	26.78
O12	D320	26.78
P11	D320	26.86
P12	D320	26.77
Conditions	Position	Name	Ct	Diff Ct	Ct Mean	Concentration	Mean
Control	A9	1a	24.13	-0.21	24.235	0.346	0.325
Control	B9	1b	24.34			0.304
Restriction	C9	2a	24.21	-0.21	24.315	0.33	0.309
Restriction	D9	2b	24.42			0.288
Control	E9	3a	24.2	-0.09	24.245	0.332	0.322
Control	F9	3b	24.29			0.312
Restriction	G9	4a	24.7	-0.19	24.795	0.24	0.226
Restriction	H9	4b	24.89			0.212
Control	I9	5a	25.02	-0.08	25.06	0.195	0.19
Control	J9	5b	25.1			0.185
Restriction	K9	6a	24.12	-0.18	24.21	0.35	0.3305
Restriction	L9	6b	24.3			0.311
Control	M9	7a	24.61	-0.05	24.635	0.253	0.2495
Control	N9	7b	24.66			0.246
Restriction	O9	8a	24.65	-0.1	24.7	0.247	0.2395
Restriction	P9	8b	24.75			0.232
Control	A10	9a	25.34	-0.1	25.39	0.158	0.153
Control	B10	9b	25.44			0.148
Restriction	C10	10a	24.67	0	24.67	0.244	0.2445
Restriction	D10	10b	24.67			0.245
Control	E10	11a	25.91	-0.15	25.985	0.109	0.1041
Control	F10	11b	26.06			0.0992
Restriction	G10	12a	24.46	-0.19	24.555	0.28	0.2635
Restriction	H10	12b	24.65			0.247
Control	I10	13a	24.79	-0.14	24.86	0.226	0.216
Control	J10	13b	24.93			0.206
Restriction	K10	14a	25.54	-0.05	25.565	0.139	0.1365
Restriction	L10	14b	25.59			0.134
Control	M10	15a	23.76	-0.06	23.79	0.44	0.432
Control	N10	15b	23.82			0.424
Restriction	O10	16a	23.88	-0.12	23.94	0.409	0.3935
Restriction	P10	16b	24			0.378

## Sheet: PK
Manip Luis.P_ShrimpDay25_Trial 4_RT23/08/2017_Mélanie SERUSIER
Gene PK
Pos	Name	Cp	Diff	Mean	SD		Position	Name	Ct
G15	D20	20.86	0.09	20.87	-1.03		A15	bADN	40
G16	D20	20.91					B15	bADN
H15	D20	20.82					E15	bPCR	40
H16	D20	20.89					F15	bPCR
I15	D40	21.9	0.08	21.9	-1.0225		C15	bRT
I16	D40	21.95					D15	bRT	40
J15	D40	21.87
J16	D40	21.88					Error	0.00331
K15	D80	22.92	0.19	22.9225	-1.085		Efficiency	1.945
K16	D80	23.01					Link	0
L15	D80	22.82
L16	D80	22.94
M15	D160	23.99	0.05	24.0075	-0.99
M16	D160	24.04
N15	D160	24
N16	D160	24
O15	D320	24.94	0.16	24.9975
O16	D320	24.98
P15	D320	24.97
P16	D320	25.1
Conditions	Position	Name	Ct	Diff Ct	Ct Mean	Concentration	Mean
Control	A13	1a	22.89	-0.13	22.955	0.258	0.2475
Control	B13	1b	23.02			0.237
Restriction	C13	2a	22.93	-0.13	22.995	0.253	0.2425
Restriction	D13	2b	23.06			0.232
Control	E13	3a	22.33	-0.18	22.42	0.377	0.3555
Control	F13	3b	22.51			0.334
Restriction	G13	4a	22.89	-0.19	22.985	0.26	0.244
Restriction	H13	4b	23.08			0.228
Control	I13	5a	22.9	-0.09	22.945	0.257	0.25
Control	J13	5b	22.99			0.243
Restriction	K13	6a	22.49	-0.11	22.545	0.339	0.327
Restriction	L13	6b	22.6			0.315
Control	M13	7a	22.92	0.1	22.87	0.253	0.262
Control	N13	7b	22.82			0.271
Restriction	O13	8a	22.69	-0.12	22.75	0.296	0.285
Restriction	P13	8b	22.81			0.274
Control	A14	9a	23.43	-0.1	23.48	0.182	0.1755
Control	B14	9b	23.53			0.169
Restriction	C14	10a	22.81	-0.05	22.835	0.274	0.2695
Restriction	D14	10b	22.86			0.265
Control	E14	11a	23.48	-0.03	23.495	0.175	0.1735
Control	F14	11b	23.51			0.172
Restriction	G14	12a	22.78	-0.13	22.845	0.279	0.2675
Restriction	H14	12b	22.91			0.256
Control	I14	13a	22.98	-0.06	23.01	0.244	0.239
Control	J14	13b	23.04			0.234
Restriction	K14	14a	23.22	-0.04	23.24	0.208	0.2055
Restriction	L14	14b	23.26			0.203
Control	M14	15a	22.56	0	22.56	0.323	0.323
Control	N14	15b	22.56			0.323
Restriction	O14	16a	22.82	-0.06	22.85	0.272	0.2665
Restriction	P14	16b	22.88			0.261

## Sheet: HK
Manip Luis.P_ShrimpDay25_Trial 4_RT23/08/2017_Mélanie SERUSIER
Gene HK
Pos	Name	Cp	Diff	Mean	SD		Position	Name	Ct
G19	D20	23.94	0.09	23.93	-1.045		A19	bADN
G20	D20	23.97					B19	bADN
H19	D20	23.93					E19	bPCR
H20	D20	23.88					F19	bPCR
I19	D40	24.87	0.17	24.975	-1.055		C19	bRT
I20	D40	24.99					D19	bRT
J19	D40	25.04
J20	D40	25					Error	0.00635
K19	D80	26.05	0.11	26.03	-1.08		Efficiency	1.944
K20	D80	25.98					Link	0
L19	D80	26
L20	D80	26.09
M19	D160	27	0.24	27.11	-0.99
M20	D160	27.24
N19	D160					27.46
N20	D160	27.09
O19	D320	27.97	0.26	28.1
O20	D320	28.23
P19	D320					28.58
P20	D320					27.51
Conditions	Position	Name	Ct	Diff Ct	Ct Mean	Concentration	Mean
Control	A17	1a	26.31	0.08	26.27	0.208	0.2135
Control	B17	1b	26.23			0.219
Restriction	C17	2a	27.01	0.02	27	0.13	0.131
Restriction	D17	2b	26.99			0.132
Control	E17	3a	25.49	-0.16	25.57	0.357	0.34
Control	F17	3b	25.65			0.323
Restriction	G17	4a	25.75	-0.12	25.81	0.302	0.2895
Restriction	H17	4b	25.87			0.277
Control	I17	5a	26	-0.1	26.05	0.255	0.2465
Control	J17	5b	26.1			0.238
Restriction	K17	6a	25.21	-0.06	25.24	0.432	0.4235
Restriction	L17	6b	25.27			0.415
Control	M17	7a	26.03	-0.14	26.1	0.249	0.2385
Control	N17	7b	26.17			0.228
Restriction	O17	8a	25.46	-0.09	25.505	0.366	0.355
Restriction	P17	8b	25.55			0.344
Control	A18	9a	25.82	-0.01	25.825	0.288	0.287
Control	B18	9b	25.83			0.286
Restriction	C18	10a	25.41	-0.1	25.46	0.377	0.365
Restriction	D18	10b	25.51			0.353
Control	E18	11a	27.46	0.29	27.315	0.0964	0.1067
Control	F18	11b	27.17			0.117
Restriction	G18	12a	25.48	-0.23	25.595	0.361	0.3355
Restriction	H18	12b	25.71			0.31
Control	I18	13a	25.9	-0.12	25.96	0.272	0.262
Control	J18	13b	26.02			0.252
Restriction	K18	14a	26.02	-0.09	26.065	0.252	0.2445
Restriction	L18	14b	26.11			0.237
Control	M18	15a	26.22	0.1	26.17	0.22	0.228
Control	N18	15b	26.12			0.236
Restriction	O18	16a	26.72	-0.03	26.735	0.158	0.1565
Restriction	P18	16b	26.75			0.155

## Sheet: CoxA
Manip Luis.P_ShrimpDay25_Trial 4_RT23/08/2017_Mélanie SERUSIER
Gene CoxA
Pos	Name	Cp	Diff	Mean	SD		Position	Name	Ct
G23	D20	22.51	0.2	22.6275	-1.0775		A23	bADN
G24	D20	22.64					B23	bADN	40
H23	D20	22.65					E23	bPCR
H24	D20	22.71					F23	bPCR
I23	D40	23.57	0.21	23.705	-1.2575		C23	bRT
I24	D40	23.78					D23	bRT
J23	D40	23.73
J24	D40	23.74					Error	0.00972
K23	D80	25.31	0.47	24.9625	-0.9025		Efficiency	1.908
K24	D80	24.84					Link	0
L23	D80	24.86
L24	D80	24.84
M23	D160	25.73	0.23	25.865	-1.0275
M24	D160	25.9
N23	D160	25.87
N24	D160	25.96
O23	D320	26.66	0.38	26.8925
O24	D320	26.92
P23	D320	26.95
P24	D320	27.04
Conditions	Position	Name	Ct	Diff Ct	Ct Mean	Concentration	Mean
Control	A21	1a	24.57	-0.26	24.7	0.292	0.2695
Control	B21	1b	24.83			0.247
Restriction	C21	2a	25	-0.3	25.15	0.221	0.202
Restriction	D21	2b	25.3			0.183
Control	E21	3a	23.94	-0.27	24.075	0.438	0.4035
Control	F21	3b	24.21			0.369
Restriction	G21	4a	24.53	-0.29	24.675	0.299	0.2735
Restriction	H21	4b	24.82			0.248
Control	I21	5a	24.64	-0.34	24.81	0.279	0.2515
Control	J21	5b	24.98			0.224
Restriction	K21	6a	23.83	-0.4	24.03	0.471	0.4175
Restriction	L21	6b	24.23			0.364
Control	M21	7a	24.59	-0.26	24.72	0.289	0.2665
Control	N21	7b	24.85			0.244
Restriction	O21	8a	24.18	-0.41	24.385	0.376	0.3325
Restriction	P21	8b	24.59			0.289
Control	A22	9a	25	-0.03	25.015	0.222	0.2195
Control	B22	9b	25.03			0.217
Restriction	C22	10a	24.59	-0.16	24.67	0.289	0.2745
Restriction	D22	10b	24.75			0.26
Control	E22	11a	25.17	-0.03	25.185	0.199	0.1965
Control	F22	11b	25.2			0.194
Restriction	G22	12a	24.29	-0.3	24.44	0.349	0.318
Restriction	H22	12b	24.59			0.287
Control	I22	13a	24.69	-0.21	24.795	0.27	0.253
Control	J22	13b	24.9			0.236
Restriction	K22	14a	25.06	-0.11	25.115	0.213	0.206
Restriction	L22	14b	25.17			0.199
Control	M22	15a	24.25	-0.17	24.335	0.358	0.34
Control	N22	15b	24.42			0.322
Restriction	O22	16a	24.75	-0.18	24.84	0.261	0.2465
Restriction	P22	16b	24.93			0.232

[truncated: 18 more sheets: CoxB, CoxC, ATPb, ATPa, GLUT2, GLUT1, GDH, GS, Chytry, Lipase, Tryp, Amy, CHH, FAS, ATPa(2), GDH (2), CHYTRY (2), AMY (2)]
