# Supplementary material for: Long-term impact of a 4-day feed restriction at the protozoea stage on metabolic gene expressions of whiteleg shrimp (Litopenaeus vannamei)
Source: PeerJ. 2020 Mar 20;8:e8715. doi: 10.7717/peerj.8715 (PMC7087488; doi:10.7717/peerj.8715)
Supplement: Supplemental Information 3 [file peerj-08-8715-s003.xlsx]

## Sheet: EF1 RT010917
	Manip Luis.P_ShrimpDay40_Trial 4_RT01/09/2017_Mélanie SERUSIER
	Gene EF1
	Pos	Name	Cp	Diff	Mean	SD		Position	Name	Ct
	G5	D20	18.67	0.06	18.6725	-1.0275		C5	bADN	32.84
	G6	D20	18.7					D5	bADN	33.91
	H5	D20	18.68					E5	bPCR	34.56
	H6	D20	18.64					F5	bPCR	35
	I5	D40	19.68	0.08	19.7	-1.035		A5	bRT	30.55
	I6	D40	19.7					B5	bRT	33.98
	J5	D40	19.67
	J6	D40	19.75					Error	0.00548
	K5	D80	20.67	0.09	20.735	-1.025		Efficiency	1.953
	K6	D80	20.75					Link	0
	L5	D80	20.76
	L6	D80	20.76
	M5	D160	21.76	0.04	21.76	-1.06
	M6	D160	21.78
	N5	D160	21.76
	N6	D160	21.74
	O5	D320	22.74	0.16	22.82
	O6	D320	22.9
	P5	D320	22.82
	P6	D320	22.82
	Conditions	Position	Name	Ct	Diff Ct	Mean Ct	∆ Mean	Mean of means CT	Concentration	Mean
	Control	A1	1a	21	0.08	20.96	0.945	20.4875	0.21	0.311
	Control	B1	1a	20.92					0.222
	Control	A2	1b	19.99	-0.05	20.015			0.412
	Control	B2	1b	20.04					0.4
	Restriction	C1	2a	21.49	-0.05	21.515	0.86	21.085	0.151	0.20675
	Restriction	D1	2a	21.54					0.146
	Restriction	C2	2b	20.62	-0.07	20.655			0.271
	Restriction	D2	2b	20.69					0.259
	Control	E1	3a	20.53	-0.11	20.585	0.045	20.5625	0.287	0.2815
	Control	F1	3a	20.64					0.267
	Control	E2	3b	20.52	-0.04	20.54			0.29
	Control	F2	3b	20.56					0.282
	Restriction	G1	4a	20.25	-0.05	20.275	0.15	20.2	0.346	0.35875
	Restriction	H1	4a	20.3					0.336
	Restriction	G2	4b	20.12	-0.01	20.125			0.378
	Restriction	H2	4b	20.13					0.375
	Control	I1	5a	20.43	0.3	20.28	0	20.28	0.308	0.34075
	Control	J1	5a	20.13					0.375
	Control	I2	5b	20.28	0	20.28			0.339
	Control	J2	5b	20.28					0.341
	Restriction	K1	6a	19.84	-0.07	19.875	-1.03	20.39	0.456	0.33525
	Restriction	L1	6a	19.91					0.436
	Restriction	K2	6b	20.88	-0.05	20.905			0.228
	Restriction	L2	6b	20.93					0.221
	Control	M1	7a	20	-0.1	20.05	-0.745	20.4225	0.409	0.3185
	Control	N1	7a	20.1					0.384
	Control	M2	7b	20.77	-0.05	20.795			0.245
	Control	N2	7b	20.82					0.236
	Restriction	O1	8a	20.55	-0.04	20.57	-0.615	20.8775	0.284	0.23275
	Restriction	P1	8a	20.59					0.276
	Restriction	O2	8b	21.19	0.01	21.185			0.185
	Restriction	P2	8b	21.18					0.186
	Control	A3	9a	21.73	2.22	20.62	-2.165	21.7025	0.129	0.207175
	Control	B3	9a	19.51					0.57
	Control	A4	9b	22.49	-0.59	22.785			0.0774
	Control	B4	9b	23.08					0.0523
	Restriction	C3	10a	22.46	1.55	21.685	-0.395	21.8825	0.0792	0.12625
	Restriction	D3	10a	20.91					0.222
	Restriction	C4	10b	22.02	-0.12	22.08			0.106
	Restriction	D4	10b	22.14					0.0978
	Control	E3	11a	21.77	21.77	21.77	0.145	21.6975	0.126	0.171
	Control	F3	11a						0.281		20.57
	Control	E4	11b	21.6	-0.05	21.625			0.141
	Control	F4	11b	21.65					0.136
	Restriction	G3	12a	21.23	0.56	20.95	0	20.95	0.18	0.21925
	Restriction	H3	12a	20.67					0.262
	Restriction	G4	12b	20.93	-0.04	20.95			0.22
	Restriction	H4	12b	20.97					0.215
	Control	I3	13a	20.05	0.49	19.805	-1.13	20.37	0.396	0.347
	Control	J3	13a	19.56					0.553
	Control	I4	13b	20.92	-0.03	20.935			0.222
	Control	J4	13b	20.95					0.217
	Restriction	K3	14a	20.19	0.04	20.17	-0.825	20.5825	0.362	0.28875
	Restriction	L3	14a	20.15					0.371
	Restriction	K4	14b	20.98	-0.03	20.995			0.213
	Restriction	L4	14b	21.01					0.209
	Control	M3	15a	19.44	0.31	19.285	-1.795	20.1825	0.596	0.43175
	Control	N3	15a	19.13					0.732
	Control	M4	15b	21.06	-0.04	21.08			0.202
	Control	N4	15b	21.1					0.197
	Restriction	O3	16a	19.99	0	19.99	-1.17	20.575	0.414	0.30125
	Restriction	P3	16a	19.99					0.413
	Restriction	O4	16b	21.12	-0.08	21.16			0.194
	Restriction	P4	16b	21.2					0.184

## Sheet: EF1 RT01092017_2
	Manip Luis.P_ShrimpDay40_Trial 4_RT01/09/2017_Mélanie SERUSIER
	Gene EF1 (2)
	Pos	Name	Cp	Diff	Mean	SD		Position	Name	Ct
	G5	D20	18.96	0.48	18.6633	-0.876667		A5	bADN	29.67
	G6	D20					17.92	B5	bADN	32.51
	H5	D20	18.48					E5	bPCR	35.43
	H6	D20	18.55					F5	bPCR	28.53
	I5	D40		0.1	19.54	-0.88	36.68	C5	bRT	34.08
	I6	D40					18.98	D5	bRT	34.9
	J5	D40	19.49
	J6	D40	19.59					Error	0.0185
	K5	D80		0.28	20.42	-1.06333	26.2	Efficiency	2.004
	K6	D80					20.05	Link	0
	L5	D80	20.28
	L6	D80	20.56
	M5	D160		0.77	21.4833	-1.00667
	M6	D160	21.08
	N5	D160	21.52
	N6	D160	21.85
	O5	D320		0.33	22.49		36.07
	O6	D320	22.32
	P5	D320	22.65
	P6	D320	22.5
	Conditions	Position	Name	Ct	Diff Ct	Mean Ct	∆ Mean	Mean of means CT	Concentration	Mean
	Control	A1	1a	20.79	-0.12	20.85	0.98	20.36	0.204	0.2925
	Control	B1	1a	20.91					0.188
	Control	A2	1b	19.78	-0.18	19.87			0.413
	Control	B2	1b	19.96					0.365
	Restriction	C1	2a	21.25	-0.04	21.27	0.82	20.86	0.148	0.2025
	Restriction	D1	2a	21.29					0.144
	Restriction	C2	2b	20.45	0	20.45			0.26
	Restriction	D2	2b	20.45					0.258
	Control	E1	3a	20.31	-0.17	20.395	0.035	20.3775	0.285	0.2725
	Control	F1	3a	20.48					0.253
	Control	E2	3b	20.25	-0.22	20.36			0.297
	Control	F2	3b	20.47					0.255
	Restriction	G1	4a	20.03	-0.13	20.095	0.145	20.0225	0.347	0.35
	Restriction	H1	4a	20.16					0.318
	Restriction	G2	4b	19.92	-0.06	19.95			0.375
	Restriction	H2	4b	19.98					0.36
	Control	I1	5a	20.19	-0.13	20.255	0.155	20.1775	0.31	0.3135
	Control	J1	5a	20.32					0.284
	Control	I2	5b	20.08	-0.04	20.1			0.335
	Control	J2	5b	20.12					0.325
	Restriction	K1	6a	19.73	-0.01	19.735	-1	20.235	0.428	0.31925
	Restriction	L1	6a	19.74					0.423
	Restriction	K2	6b	20.73	-0.01	20.735			0.214
	Restriction	L2	6b	20.74					0.212
	Control	M1	7a	19.87	-0.05	19.895	-0.675	20.2325	0.387	0.309
	Control	N1	7a	19.92					0.373
	Control	M2	7b	20.51	-0.12	20.57			0.248
	Control	N2	7b	20.63					0.228
	Restriction	O1	8a	20.61	0.1	20.56	-0.545	20.8325	0.232	0.20225
	Restriction	P1	8a	20.51					0.248
	Restriction	O2	8b	21.16	0.11	21.105			0.158
	Restriction	P2	8b	21.05					0.171
	Control	A3	9a	21.58	-0.18	21.67	-0.755	22.0475	0.118	0.088625
	Control	B3	9a	21.76					0.104
	Control	A4	9b	22.2	-0.45	22.425			0.0765
	Control	B4	9b	22.65					0.056
	Restriction	C3	10a	21.88	0.02	21.87	-0.065	21.9025	0.0955	0.094325
	Restriction	D3	10a	21.86					0.0973
	Restriction	C4	10b	21.89	-0.09	21.935			0.0952
	Restriction	D4	10b	21.98					0.0893
	Control	E3	11a	21.85	-0.04	21.87	0.45	21.645	0.0979	0.114025
	Control	F3	11a	21.89					0.0952
	Control	E4	11b	21.34	-0.16	21.42			0.139
	Control	F4	11b	21.5					0.124
	Restriction	G3	12a	21.62	0.08	21.58	0.805	21.1775	0.115	0.16225
	Restriction	H3	12a	21.54					0.121
	Restriction	G4	12b	20.78	0.01	20.775			0.206
	Restriction	H4	12b	20.77					0.207
	Control	I3	13a	20.52	-0.12	20.58	-0.145	20.6525	0.247	0.22525
	Control	J3	13a	20.64					0.227
	Control	I4	13b	20.72	-0.01	20.725			0.214
	Control	J4	13b	20.73					0.213
	Restriction	K3	14a	20.27	-0.16	20.35	-0.345	20.5225	0.293	0.24825
	Restriction	L3	14a	20.43					0.263
	Restriction	K4	14b	20.63	-0.13	20.695			0.229
	Restriction	L4	14b	20.76					0.208
	Control	M3	15a	19.94	-0.02	19.95	-0.87	20.385	0.369	0.2845
	Control	N3	15a	19.96					0.365
	Control	M4	15b	20.65	-0.34	20.82			0.226
	Control	N4	15b	20.99					0.178
	Restriction	O3	16a	20.92	0.3	20.77	-0.24	20.89	0.187	0.192
	Restriction	P3	16a	20.62					0.23
	Restriction	O4	16b	20.96	-0.1	21.01			0.182
	Restriction	P4	16b	21.06					0.169

## Sheet: Lucif RT010917
	Manip Luis.P_ShrimpDay40_Trial 4_RT01/09/2017_Mélanie SERUSIER
	Gene Luciferase
	Pos	Name	Cp	Diff	Mean	SD		Position	Name	Ct
	G11	D20	14.71	0.37	14.8725	-0.9275		C11	bADN	35.08
	G12	D20	15.08					D11	bADN	35.64
	H11	D20	14.88					E11	bPCR	32.17
	H12	D20	14.82					F11	bPCR	34.09
	I11	D40	15.81	0.07	15.8	-1.0025		A11	bRT	31.28
	I12	D40	15.76					B11	bRT	40
	J11	D40	15.83
	J12	D40	15.8					Error	0.0083
	K11	D80	16.81	0.02	16.8025	-1.03		Efficiency	2.03
	K12	D80	16.8					Link	0
	L11	D80	16.79
	L12	D80	16.81
	M11	D160	17.82	0.03	17.8325	-1.035
	M12	D160	17.83
	N11	D160	17.83
	N12	D160	17.85
	O11	D320	18.81	0.09	18.8675
	O12	D320	18.9
	P11	D320	18.87
	P12	D320	18.89
	Conditions	Position	Name	Ct	Diff Ct	Mean Ct	∆ Mean	Mean of means CT	Concentration	Mean
	Control	A7	1a	17.24	-0.06	17.27	0.895	16.8225	0.182	0.258
	Control	B7	1a	17.3					0.175
	Control	A8	1b	16.34	-0.07	16.375			0.346
	Control	B8	1b	16.41					0.329
	Restriction	C7	2a	17.56	-0.03	17.575	0.935	17.1075	0.146	0.2115
	Restriction	D7	2a	17.59					0.142
	Restriction	C8	2b	16.66	0.04	16.64			0.275
	Restriction	D8	2b	16.62					0.283
	Control	E7	3a	16.87	-0.06	16.9	0.16	16.82	0.238	0.2465
	Control	F7	3a	16.93					0.228
	Control	E8	3b	16.72	-0.04	16.74			0.264
	Control	F8	3b	16.76					0.256
	Restriction	G7	4a	16.57	-0.07	16.605	0.34	16.435	0.294	0.32575
	Restriction	H7	4a	16.64					0.279
	Restriction	G8	4b	16.27	0.01	16.265			0.364
	Restriction	H8	4b	16.26					0.366
	Control	I7	5a	16.8	-0.01	16.805	0.21	16.7	0.249	0.26875
	Control	J7	5a	16.81					0.248
	Control	I8	5b	16.57	-0.05	16.595			0.294
	Control	J8	5b	16.62					0.284
	Restriction	K7	6a	16.27	-0.14	16.34	-0.735	16.7075	0.364	0.2755
	Restriction	L7	6a	16.41					0.328
	Restriction	K8	6b	17.07	-0.01	17.075			0.206
	Restriction	L8	6b	17.08					0.204
	Control	M7	7a	16.53	-0.03	16.545	-0.475	16.7825	0.303	0.25675
	Control	N7	7a	16.56					0.297
	Control	M8	7b	17.01	-0.02	17.02			0.215
	Control	N8	7b	17.03					0.212
	Restriction	O7	8a	16.6	0.04	16.58	-0.54	16.85	0.288	0.24575
	Restriction	P7	8a	16.56					0.296
	Restriction	O8	8b	17.1	-0.04	17.12			0.202
	Restriction	P8	8b	17.14					0.197
	Control	A9	9a	14.87	-3.55	16.645	-1.9	17.595	0.98	0.30115
	Control	B9	9a	18.42					0.0792
	Control	A10	9b	18.55	0.01	18.545			0.0724
	Control	B10	9b	18.54					0.073
	Restriction	C9	10a	16.17	-2.48	17.41	-0.5	17.66	0.39	0.1714
	Restriction	D9	10a	18.65					0.0676
	Restriction	C10	10b	17.9	-0.02	17.91			0.115
	Restriction	D10	10b	17.92					0.113
	Control	E9	11a	15.71	-2.15	16.785	-0.14	16.855	0.541	0.27925
	Control	F9	11a	17.86					0.118
	Control	E10	11b	16.83	-0.19	16.925			0.245
	Control	F10	11b	17.02					0.213
	Restriction	G9	12a	15.9	-2.1	16.95	0.11	16.895	0.474	0.26675
	Restriction	H9	12a	18					0.107
	Restriction	G10	12b	16.81	-0.06	16.84			0.249
	Restriction	H10	12b	16.87					0.237
	Control	I9	13a	14.69	-1.97	15.675	-1	16.175	1.11	0.483
	Control	J9	13a	16.66					0.276
	Control	I10	13b	16.67	-0.01	16.675			0.274
	Control	J10	13b	16.68					0.272
	Restriction	K9	14a	15.61	-0.62	15.92	-0.635	16.2375	0.578	0.387
	Restriction	L9	14a	16.23					0.374
	Restriction	K10	14b	16.5	-0.11	16.555			0.309
	Restriction	L10	14b	16.61					0.287
	Control	M9	15a	15.03	-0.98	15.52	-1.5	16.27	0.875	0.435
	Control	N9	15a	16.01					0.438
	Control	M10	15b	16.93	-0.18	17.02			0.227
	Control	N10	15b	17.11					0.2
	Restriction	O9	16a	15.86	-0.16	15.94	-0.945	16.4125	0.485	0.3475
	Restriction	P9	16a	16.02					0.434
	Restriction	O10	16b	16.84	-0.09	16.885			0.243
	Restriction	P10	16b	16.93					0.228

## Sheet: Lucif RT01092017_2
	Manip Luis.P_ShrimpDay40_Trial 4_RT01/09/2017_Mélanie SERUSIER
	Gene Luciferase (2)
	Pos	Name	Cp	Diff	Mean	SD		Position	Name	Ct
	G11	D20	14.99	0.25	14.9825	-0.9		A11	bADN	32.76
	G12	D20	14.97					B11	bADN	34.31
	H11	D20	15.11					E11	bPCR	33.18
	H12	D20	14.86					F11	bPCR	33.5
	I11	D40	15.83	0.12	15.8825	-0.945		C11	bRT	34.05
	I12	D40	15.85					D11	bRT	33.04
	J11	D40	15.9
	J12	D40	15.95					Error	0.00645
	K11	D80	16.77	0.1	16.8275	-1.055		Efficiency	2.039
	K12	D80	16.87					Link	0
	L11	D80	16.87
	L12	D80	16.8
	M11	D160	17.79	0.15	17.8825	-0.98
	M12	D160	17.91
	N11	D160	17.89
	N12	D160	17.94
	O11	D320	18.76	0.16	18.8625
	O12	D320	18.86
	P11	D320	18.91
	P12	D320	18.92
	Conditions	Position	Name	Ct	Diff Ct	Mean Ct	∆ Mean	Mean of means CT	Concentration	Mean
	Control	A7	1a	17.63	0	17.63	1.255	17.0025	0.147	0.253
	Control	B7	1a	17.63					0.147
	Control	A8	1b	16.31	-0.13	16.375			0.375
	Control	B8	1b	16.44					0.343
	Restriction	C7	2a	17.53	-0.11	17.585	0.985	17.0925	0.157	0.22875
	Restriction	D7	2a	17.64					0.146
	Restriction	C8	2b	16.57	-0.06	16.6			0.312
	Restriction	D8	2b	16.63					0.3
	Control	E7	3a	16.82	-0.22	16.93	0.11	16.875	0.262	0.252
	Control	F7	3a	17.04					0.224
	Control	E8	3b	16.76	-0.12	16.82			0.272
	Control	F8	3b	16.88					0.25
	Restriction	G7	4a	16.62	-0.09	16.665	0.365	16.4825	0.302	0.33575
	Restriction	H7	4a	16.71					0.282
	Restriction	G8	4b	16.16	-0.28	16.3			0.417
	Restriction	H8	4b	16.44					0.342
	Control	I7	5a	16.74	-0.16	16.82	0.215	16.7125	0.277	0.283
	Control	J7	5a	16.9					0.247
	Control	I8	5b	16.61	0.01	16.605			0.303
	Control	J8	5b	16.6					0.305
	Restriction	K7	6a	16.32	-0.21	16.425	-0.74	16.795	0.372	0.27575
	Restriction	L7	6a	16.53					0.322
	Restriction	K8	6b	17.15	-0.03	17.165			0.207
	Restriction	L8	6b	17.18					0.202
	Control	M7	7a	16.54	-0.13	16.605	-0.325	16.7675	0.32	0.274
	Control	N7	7a	16.67					0.292
	Control	M8	7b	16.92	-0.02	16.93			0.244
	Control	N8	7b	16.94					0.24
	Restriction	O7	8a	16.63	-0.09	16.675	-0.475	16.9125	0.3	0.2485
	Restriction	P7	8a	16.72					0.281
	Restriction	O8	8b	17.11	-0.08	17.15			0.213
	Restriction	P8	8b	17.19					0.2
	Control	A9	9a	18.07	0.14	18	-0.57	18.285	0.107	0.09415
	Control	B9	9a	17.93					0.119
	Control	A10	9b	18.57	0	18.57			0.0752
	Control	B10	9b	18.57					0.0754
	Restriction	C9	10a	17.8	-0.17	17.885	-0.12	17.945	0.13	0.1175
	Restriction	D9	10a	17.97					0.115
	Restriction	C10	10b	17.99	-0.03	18.005			0.114
	Restriction	D10	10b	18.02					0.111
	Control	E9	11a	17.24	-0.32	17.4	0.42	17.19	0.194	0.204
	Control	F9	11a	17.56					0.154
	Control	E10	11b	16.94	-0.08	16.98			0.241
	Control	F10	11b	17.02					0.227
	Restriction	G9	12a	17.46	-0.3	17.61	0.705	17.2575	0.166	0.19825
	Restriction	H9	12a	17.76					0.134
	Restriction	G10	12b	16.87	-0.07	16.905			0.252
	Restriction	H10	12b	16.94					0.241
	Control	I9	13a	16.6	0.07	16.565	-0.175	16.6525	0.306	0.29525
	Control	J9	13a	16.53					0.321
	Control	I10	13b	16.68	-0.12	16.74			0.288
	Control	J10	13b	16.8					0.266
	Restriction	K9	14a	16.09	-0.2	16.19	-0.375	16.3775	0.44	0.36175
	Restriction	L9	14a	16.29					0.38
	Restriction	K10	14b	16.49	-0.15	16.565			0.33
	Restriction	L10	14b	16.64					0.297
	Control	M9	15a	16.2	-0.06	16.23	-0.88	16.67	0.406	0.3055
	Control	N9	15a	16.26					0.391
	Control	M10	15b	17.07	-0.08	17.11			0.219
	Control	N10	15b	17.15					0.206
	Restriction	O9	16a	16.96	-0.09	17.005	0.09	16.96	0.237	0.237
	Restriction	P9	16a	17.05					0.223
	Restriction	O10	16b	16.89	-0.05	16.915			0.248
	Restriction	P10	16b	16.94					0.24

## Sheet: Stats Analyzes
Conditions	sample	EF1	Luciferase	PEPCK	PEPCK NORM	FBP	FBP NORM	LDH	LDH NORM	PK	PK NORM	HK	HK NORM	COXA	COXA NORM
Control	1	0.2925	0.253	0.2215	0.757265	0.3075	1.05128	0.239	0.817094	0.2075	0.709402	0.2945	1.00684	0.293	1.00171
Restriction	2	0.2025	0.22875	0.2315	1.14321	0.143	0.706173	0.1825	0.901235	0.192	0.948148	0.288	1.42222	0.164	0.809877
Control	3	0.2725	0.252	0.3275	1.20183	0.355	1.30275	0.254	0.93211	0.253	0.92844	0.446	1.6367	0.3275	1.20183
Restriction	4	0.35	0.33575	0.41	1.17143	0.475	1.35714	0.2875	0.821429	0.296	0.845714	0.534	1.52571	0.396	1.13143
Control	5	0.3135	0.283	0.4025	1.28389	0.415	1.32376	0.2645	0.8437	0.3335	1.0638	0.417	1.33014	0.4065	1.29665
Restriction	6	0.31925	0.27575	0.365	1.1433	0.321	1.00548	0.232	0.726703	0.3535	1.10728	0.325	1.01801	0.3735	1.16993
Control	7	0.309	0.274	0.3325	1.07605	0.3245	1.05016	0.3255	1.0534	0.391	1.26537	0.3105	1.00485	0.384	1.24272
Restriction	8	0.20225	0.2485	0.2385	1.17923	0.2035	1.00618	0.2205	1.09023	0.23	1.13721	0.2595	1.28307	0.283	1.39926
Control	9	0.088625	0.09415	0.1079	1.21749	0.098	1.10578	0.10695	1.20677	0.148	1.66996	0.1117	1.26037	0.11975	1.3512
Restriction	10	0.094325	0.1175	0.0877	0.929764	0.1039	1.10151	0.1645	1.74397	0.1725	1.82878	0.0947	1.00398	0.0973	1.03154
Control	11	0.114025	0.204	0.092	0.806841	0.1003	0.879632	0.2095	1.83732	0.209	1.83293	0.0955	0.837536	0.157	1.37689
Restriction	12	0.16225	0.19825	0.091	0.560863	0.1615	0.995378	0.25	1.54083	0.213	1.31279	0.1765	1.08783	0.19	1.17103
Control	13	0.22525	0.29525	0.146	0.648169	0.2255	1.00111	0.3845	1.70699	0.391	1.73585	0.1785	0.792453	0.3535	1.56937
Restriction	14	0.24825	0.36175	0.3265	1.31521	0.2495	1.00504	0.187	0.753273	0.2605	1.04935	0.2365	0.952669	0.2375	0.956697
Control	15	0.2845	0.3055	0.2865	1.00703	0.32	1.12478	0.2385	0.838313	0.268	0.942004	0.3745	1.31634	0.2545	0.894552
Restriction	16	0.192	0.237	0.256	1.33333	0.257	1.33854	0.2415	1.25781	0.333	1.73437	0.23	1.19792	0.3	1.5625
Conditions	sample	EF1	Luciferase	COXB	COXB NORM	COXC	COXC NORM	ATPB	ATPB NORM	ATPA	ATPANORM	GLUT2	GLUT2 NORM	GLUT1	GLUT1 NORM
Control	1	0.2925	0.253	0.362	1.23761	0.2915	0.996581	0.2925	1	0.279	0.953846	0.278	0.950427	0.279	0.953846
Restriction	2	0.2025	0.22875	0.243	1.2	0.2015	0.995062	0.1895	0.935802	0.186	0.918519	0.35	1.7284	0.1655	0.817284
Control	3	0.2725	0.252	0.3095	1.13578	0.293	1.07523	0.3095	1.13578	0.2855	1.04771	0.4485	1.64587	0.302	1.10826
Restriction	4	0.35	0.33575	0.3535	1.01	0.3495	0.998571	0.3305	0.944286	0.333	0.951429	0.6225	1.77857	0.311	0.888571
Control	5	0.3135	0.283	0.374	1.19298	0.3645	1.16268	0.35	1.11643	0.322	1.02711	0.285	0.909091	0.3835	1.22329
Restriction	6	0.31925	0.27575	0.361	1.13078	0.325	1.01801	0.293	0.917776	0.278	0.870791	0.24	0.751762	0.3545	1.11042
Control	7	0.309	0.274	0.35	1.13269	0.365	1.18123	0.3535	1.14401	0.3475	1.1246	0.3385	1.09547	0.3105	1.00485
Restriction	8	0.20225	0.2485	0.2445	1.2089	0.234	1.15698	0.232	1.1471	0.2235	1.10507	0.227	1.12237	0.2935	1.45117
Control	9	0.088625	0.09415	0.1165	1.31453	0.1305	1.4725	0.131	1.47814	0.12105	1.36587	0.1255	1.41608	0.12535	1.41439
Restriction	10	0.094325	0.1175	0.1135	1.20329	0.128	1.35701	0.1315	1.39412	0.11	1.16618	0.0936	0.992314	0.0864	0.915982
Control	11	0.114025	0.204	0.123	1.07871	0.1615	1.41636	0.1475	1.29358	0.1315	1.15326	0.0966	0.847183	0.15	1.3155
Restriction	12	0.16225	0.19825	0.166	1.02311	0.1935	1.1926	0.2245	1.38367	0.2005	1.23575	0.0984	0.606471	0.1815	1.11864
Control	13	0.22525	0.29525	0.2675	1.18757	0.287	1.27414	0.3285	1.45838	0.2875	1.27636	0.08485	0.376693	0.2585	1.14761
Restriction	14	0.24825	0.36175	0.19	0.765358	0.225	0.906344	0.225	0.906344	0.2185	0.880161	0.206	0.829809	0.248	0.998993
Control	15	0.2845	0.3055	0.2165	0.760984	0.247	0.86819	0.2815	0.989455	0.29	1.01933	0.386	1.35677	0.2415	0.848858
Restriction	16	0.192	0.237	0.2635	1.3724	0.2955	1.53906	0.287	1.49479	0.2585	1.34635	0.2355	1.22656	0.2675	1.39323
Conditions	sample	EF1	Luciferase	GDH	GDH NORM	GS	GS NORM	CHYTRY	CHYTRY NORM	LIPASE	LIPASE NORM	TRYP	TRYP NORM	AMY	AMY NORM
Control	1	0.2925	0.253	0.2805	0.958974			0.271	0.926496	0.18	0.615385	0.233	0.796581	0.223	0.762393
Restriction	2	0.2025	0.22875	0.1665	0.822222			0.2165	1.06914	0.207	1.02222	0.1815	0.896296	0.2975	1.46914
Control	3	0.2725	0.252	0.263	0.965138			0.3275	1.20183	0.4865	1.78532	0.457	1.67706	0.4365	1.60183
Restriction	4	0.35	0.33575	0.4645	1.32714			0.3375	0.964286	0.306	0.874286	0.3785	1.08143	0.4075	1.16429
Control	5	0.3135	0.283	0.338	1.07815			0.4125	1.31579	0.598	1.9075	0.752	2.39872	0.492	1.56938
Restriction	6	0.31925	0.27575	0.297	0.930305			0.2445	0.765857	0.299	0.93657	0.16235	0.508536	0.3485	1.09162
Control	7	0.309	0.274	0.3085	0.998382			0.3205	1.03722	0.412	1.33333	0.45	1.45631	0.409	1.32362
Restriction	8	0.20225	0.2485	0.2155	1.06551			0.1785	0.882571	0.269	1.33004	0.1137	0.562176	0.2545	1.25834
Control	9	0.088625	0.09415	0.1059	1.19492			0.1339	1.51086	0.1425	1.6079	0.1495	1.68688	0.126	1.42172
Restriction	10	0.094325	0.1175	0.09765	1.03525			0.1555	1.64856	0.0779	0.825868	0.1505	1.59555	0.11	1.16618
Control	11	0.114025	0.204	0.1505	1.31989			0.06735	0.59066	0.0886	0.777023	0.054	0.47358	0.1193	1.04626
Restriction	12	0.16225	0.19825	0.181	1.11556			0.121	0.745763	0.1073	0.661325	0.1415	0.872111	0.11035	0.680123
Control	13	0.22525	0.29525	0.2915	1.29412			0.06905	0.306548	0.04765	0.211543	0.05245	0.232852	0.10305	0.457492
Restriction	14	0.24825	0.36175	0.2505	1.00906			0.216	0.870091	0.3035	1.22256	0.271	1.09164	0.315	1.26888
Control	15	0.2845	0.3055	0.265	0.931459			0.302	1.06151	0.225	0.790861	0.2005	0.704745	0.2805	0.98594
Restriction	16	0.192	0.237	0.303	1.57812			0.3965	2.0651	0.2745	1.42969	0.3375	1.75781	0.291	1.51562
Conditions	sample	EF1	Luciferase	CHH	CHH NORM	FAS	FAS NORM	COX B	COXb NORM	GS	GS NORM	FBP	FBP NORM	TRYP62	TRYP62 NORM
Control	1	0.2925	0.253			0.3105	1.06154	0.3195	1.09231	0.285	0.974359	0.34	1.16239	0.231	0.789744
Restriction	2	0.2025	0.22875			0.2365	1.1679	0.245	1.20988	0.3695	1.82469	0.168	0.82963	0.184	0.908642
Control	3	0.2725	0.252			0.4155	1.52477	0.3265	1.19817	0.4605	1.68991	0.3515	1.28991	0.453	1.66239
Restriction	4	0.35	0.33575			0.3765	1.07571	0.338	0.965714	0.464	1.32571	0.445	1.27143	0.343	0.98
Control	5	0.3135	0.283			0.495	1.57895	0.3825	1.2201	0.3695	1.17863	0.4165	1.32855	0.7235	2.30781
Restriction	6	0.31925	0.27575			0.3235	1.01331	0.3845	1.20439	0.289	0.905247	0.3215	1.00705	0.161	0.504307
Control	7	0.309	0.274			0.218	0.705502	0.342	1.1068	0.3105	1.00485	0.3555	1.15049	0.47	1.52104
Restriction	8	0.20225	0.2485			0.2045	1.01112	0.235	1.16193	0.2035	1.00618	0.234	1.15698	0.1232	0.609147
Control	9	0.088625	0.09415			0.08845	0.998025	0.1265	1.42736	0.134	1.51199	0.134	1.51199	0.1625	1.83357
Restriction	10	0.094325	0.1175			0.121	1.2828	0.118	1.25099	0.1295	1.37291	0.125	1.32521	0.165	1.74927
Control	11	0.114025	0.204			0.09245	0.810787	0.13	1.1401	0.1275	1.11818	0.076	0.66652	0.0537	0.470949
Restriction	12	0.16225	0.19825			0.2065	1.27273	0.164	1.01079	0.126	0.776579	0.165	1.01695	0.1445	0.890601
Control	13	0.22525	0.29525			0.203	0.901221	0.2665	1.18313	0.1415	0.628191	0.2325	1.03219	0.05515	0.244839
Restriction	14	0.24825	0.36175			0.2565	1.03323	0.1915	0.7714	0.2785	1.12185	0.245	0.986908	0.301	1.21249
Control	15	0.2845	0.3055			0.3255	1.14411	0.215	0.755712	0.276	0.970123	0.3245	1.1406	0.2245	0.789104
Restriction	16	0.192	0.237			0.186	0.96875	0.2295	1.19531	0.229	1.19271	0.2505	1.30469	0.3645	1.89844

## Sheet: Plan1
Conditions	sample	EF1	Lipase	Amy	Chyt	Tryp	Tryp 62	fasy	gs2	gdh	atpa	atpb	coxa	coxb	coxb2	coxc	glut1	glut2	ldh	pk	hk	fbp	fbp2	pepck
Control	1	0.2925	0.615385	0.762393	0.926496	0.796581	0.789744	1.06154	0.974359	0.958974	0.953846	1	1.00171	1.23761	1.09231	0.996581	0.953846	0.950427	0.817094	0.709402	1.00684	NA	1.16239	0.757265
Restriction	2	0.2025	1.02222	1.46914	1.06914	0.896296	0.908642	1.1679	1.82469	0.822222	0.918519	0.935802	0.809877	1.2	1.20988	0.995062	0.817284	1.7284	0.901235	0.948148	1.42222	0.706173	0.82963	1.14321
Control	3	0.2725	1.78532	1.60183	1.20183	1.67706	1.66239	1.52477	1.68991	0.965138	1.04771	1.13578	1.20183	1.13578	1.19817	1.07523	1.10826	1.64587	0.93211	0.92844	1.6367	1.30275	1.28991	1.20183
Restriction	4	0.35	0.874286	1.16429	0.964286	1.08143	0.98	1.07571	1.32571	1.32714	0.951429	0.944286	1.13143	1.01	0.965714	0.998571	0.888571	1.77857	0.821429	0.845714	1.52571	1.35714	1.27143	1.17143
Control	5	0.3135	1.9075	1.56938	1.31579	2.39872	2.30781	1.57895	1.17863	1.07815	1.02711	1.11643	1.29665	1.19298	1.2201	1.16268	1.22329	0.909091	0.8437	1.0638	1.33014	1.32376	1.32855	1.28389
Restriction	6	0.31925	0.93657	1.09162	0.765857	0.508536	0.504307	1.01331	0.905247	0.930305	0.870791	0.917776	1.16993	1.13078	1.20439	1.01801	1.11042	0.751762	0.726703	1.10728	1.01801	1.00548	1.00705	1.1433
Control	7	0.309	1.33333	1.32362	1.03722	1.45631	1.52104	0.705502	1.00485	0.998382	1.1246	1.14401	1.24272	1.13269	1.1068	1.18123	1.00485	1.09547	1.0534	1.26537	1.00485	1.05016	1.15049	1.07605
Restriction	8	0.20225	1.33004	1.25834	0.882571	0.562176	0.609147	1.01112	1.00618	1.06551	1.10507	1.1471	1.39926	1.2089	1.16193	1.15698	1.45117	1.12237	1.09023	1.13721	1.28307	1.00618	1.15698	1.17923
Control	9	0.088625	1.6079	1.42172	1.51086	1.68688	1.83357	0.998025	1.51199	1.19492	1.36587	1.47814	1.3512	1.31453	1.42736	1.4725	1.41439	1.41608	1.20677	1.66996	1.26037	1.10578	1.51199	1.21749
Restriction	10	0.094325	0.825868	1.16618	1.64856	1.59555	1.74927	1.2828	1.37291	1.03525	1.16618	1.39412	1.03154	1.20329	1.25099	1.35701	0.915982	0.992314	1.74397	1.82878	1.00398	1.10151	1.32521	0.929764
Control	11	0.114025	0.777023	1.04626	0.59066	0.47358	0.470949	0.810787	1.11818	1.31989	1.15326	1.29358	1.37689	1.07871	1.1401	1.41636	1.3155	0.847183	1.83732	1.83293	0.837536	0.879632	NA	0.806841
Restriction	12	0.16225	0.661325	0.680123	0.745763	0.872111	0.890601	1.27273	0.776579	1.11556	1.23575	1.38367	1.17103	1.02311	1.01079	1.1926	1.11864	0.606471	1.54083	1.31279	1.08783	0.995378	1.01695	0.560863
Control	13	0.22525	0.211543	0.457492	0.306548	0.232852	0.244839	0.901221	0.628191	1.29412	1.27636	1.45838	1.56937	1.18757	1.18313	1.27414	1.14761	0.376693	1.70699	1.73585	0.792453	1.00111	1.03219	0.648169
Restriction	14	0.24825	1.22256	1.26888	0.870091	1.09164	1.21249	1.03323	1.12185	1.00906	0.880161	0.906344	0.956697	0.765358	0.7714	0.906344	0.998993	0.829809	0.753273	1.04935	0.952669	1.00504	0.986908	1.31521
Control	15	0.2845	0.790861	0.98594	1.06151	0.704745	0.789104	1.14411	0.970123	0.931459	1.01933	0.989455	0.894552	0.760984	0.755712	0.86819	0.848858	1.35677	0.838313	0.942004	1.31634	1.12478	1.1406	1.00703
Restriction	16	0.192	1.42969	1.51562	2.0651	1.75781	1.89844	0.96875	1.19271	1.57812	1.34635	1.49479	1.5625	1.3724	1.19531	1.53906	1.39323	1.22656	1.25781	1.73437	1.19792	1.33854	1.30469	1.33333
		Treat	Lipase	Amy	Chyt	Tryp	Tryp62	fasy	gs2	gdh	atpa	atpb	coxa	coxb	coxb2	coxc	glut1	glut2	ldh	pk	hk	fbp	fbp2	pepck
		Control	0.18	0.223	0.271	0.233	0.231	0.3105	0.285	0.2805	0.279	0.2925	0.293	0.362	0.3195	0.2915	0.279	0.278	0.239	0.2075	0.2945		0.34	0.2215
		Restriction	0.207	0.2975	0.2165	0.1815	0.184	0.2365	0.3695	0.1665	0.186	0.1895	0.164	0.243	0.245	0.2015	0.1655	0.35	0.1825	0.192	0.288	0.143	0.168	0.2315
		Control	0.4865	0.4365	0.3275	0.457	0.453	0.4155	0.4605	0.263	0.2855	0.3095	0.3275	0.3095	0.3265	0.293	0.302	0.4485	0.254	0.253	0.446	0.355	0.3515	0.3275
		Restriction	0.306	0.4075	0.3375	0.3785	0.343	0.3765	0.464	0.4645	0.333	0.3305	0.396	0.3535	0.338	0.3495	0.311	0.6225	0.2875	0.296	0.534	0.475	0.445	0.41
		Control	0.598	0.492	0.4125	0.752	0.7235	0.495	0.3695	0.338	0.322	0.35	0.4065	0.374	0.3825	0.3645	0.3835	0.285	0.2645	0.3335	0.417	0.415	0.4165	0.4025
		Restriction	0.299	0.3485	0.2445	0.16235	0.161	0.3235	0.289	0.297	0.278	0.293	0.3735	0.361	0.3845	0.325	0.3545	0.24	0.232	0.3535	0.325	0.321	0.3215	0.365
		Control	0.412	0.409	0.3205	0.45	0.47	0.218	0.3105	0.3085	0.3475	0.3535	0.384	0.35	0.342	0.365	0.3105	0.3385	0.3255	0.391	0.3105	0.3245	0.3555	0.3325
		Restriction	0.269	0.2545	0.1785	0.1137	0.1232	0.2045	0.2035	0.2155	0.2235	0.232	0.283	0.2445	0.235	0.234	0.2935	0.227	0.2205	0.23	0.2595	0.2035	0.234	0.2385
		Control	0.1425	0.126	0.1339	0.1495	0.1625	0.08845	0.134	0.1059	0.12105	0.131	0.11975	0.1165	0.1265	0.1305	0.12535	0.1255	0.10695	0.148	0.1117	0.098	0.134	0.1079
		Restriction	0.0779	0.11	0.1555	0.1505	0.165	0.121	0.1295	0.09765	0.11	0.1315	0.0973	0.1135	0.118	0.128	0.0864	0.0936	0.1645	0.1725	0.0947	0.1039	0.125	0.0877
		Control	0.0886	0.1193	0.06735	0.054	0.0537	0.09245	0.1275	0.1505	0.1315	0.1475	0.157	0.123	0.13	0.1615	0.15	0.0966	0.2095	0.209	0.0955	0.1003		0.092
		Restriction	0.1073	0.11035	0.121	0.1415	0.1445	0.2065	0.126	0.181	0.2005	0.2245	0.19	0.166	0.164	0.1935	0.1815	0.0984	0.25	0.213	0.1765	0.1615	0.165	0.091
		Control	0.04765	0.10305	0.06905	0.05245	0.05515	0.203	0.1415	0.2915	0.2875	0.3285	0.3535	0.2675	0.2665	0.287	0.2585	0.08485	0.3845	0.391	0.1785	0.2255	0.2325	0.146
		Restriction	0.3035	0.315	0.216	0.271	0.301	0.2565	0.2785	0.2505	0.2185	0.225	0.2375	0.19	0.1915	0.225	0.248	0.206	0.187	0.2605	0.2365	0.2495	0.245	0.3265
		Control	0.225	0.2805	0.302	0.2005	0.2245	0.3255	0.276	0.265	0.29	0.2815	0.2545	0.2165	0.215	0.247	0.2415	0.386	0.2385	0.268	0.3745	0.32	0.3245	0.2865
		Restriction	0.2745	0.291	0.3965	0.3375	0.3645	0.186	0.229	0.303	0.2585	0.287	0.3	0.2635	0.2295	0.2955	0.2675	0.2355	0.2415	0.333	0.23	0.257	0.2505	0.256

## Sheet: PECK
	Manip Luis.P_ShrimpDay40_Trial 4_RT01/09/2017_Mélanie SERUSIER
	Gene PEPCK
	Pos	Name	Cp	Diff	Mean	SD		Position	Name	Ct
	G3	D20	22.17	0.28	22.29	-0.995		A3	bADN	40
	G4	D20	22.45					B3	bADN
	H3	D20	22.31					E3	bPCR
	H4	D20	22.23					F3	bPCR
	I3	D40	23.26	0.22	23.285	-0.985		C3	bRT
	I4	D40	23.21					D3	bRT
	J3	D40	23.24
	J4	D40	23.43					Error	0.0144
	K3	D80	24.21	0.1	24.27	-1.1225		Efficiency	1.937
	K4	D80	24.25					Link	0
	L3	D80	24.31
	L4	D80	24.31
	M3	D160	25.33	0.15	25.3925	-1.0525
	M4	D160	25.33
	N3	D160	25.43
	N4	D160	25.48
	O3	D320	26.45	0.25	26.445
	O4	D320	26.57
	P3	D320	26.44
	P4	D320	26.32
	Conditions	Position	Name	Ct	Diff Ct	Mean Ct	Concentration	Mean
	Control	A1	1a	25.22	1.2	24.62	0.138	0.2215
	Control	B1	1b	24.02			0.305
	Restriction	C1	2a	24.91	0.83	24.495	0.169	0.2315
	Restriction	D1	2b	24.08			0.294
	Control	E1	3a	24	0.17	23.915	0.309	0.3275
	Control	F1	3b	23.83			0.346
	Restriction	G1	4a	23.68	0.2	23.58	0.382	0.41
	Restriction	H1	4b	23.48			0.438
	Control	I1	5a	23.67	0.13	23.605	0.386	0.4025
	Control	J1	5b	23.54			0.419
	Restriction	K1	6a	23.54	-0.46	23.77	0.419	0.365
	Restriction	L1	6b	24			0.311
	Control	M1	7a	23.6	-0.65	23.925	0.402	0.3325
	Control	N1	7b	24.25			0.263
	Restriction	O1	8a	24.17	-0.5	24.42	0.277	0.2385
	Restriction	P1	8b	24.67			0.2
	Control	A2	9a	25.42	-0.37	25.605	0.121	0.1079
	Control	B2	9b	25.79			0.0948
	Restriction	C2	10a	25.85	-0.12	25.91	0.091	0.0877
	Restriction	D2	10b	25.97			0.0844
	Control	E2	11a	26.05	0.4	25.85	0.08	0.092
	Control	F2	11b	25.65			0.104
	Restriction	G2	12a	26.23	0.67	25.895	0.071	0.091
	Restriction	H2	12b	25.56			0.111
	Control	I2	13a	24.99	-0.32	25.15	0.162	0.146
	Control	J2	13b	25.31			0.13
	Restriction	K2	14a	23.73	-0.41	23.935	0.371	0.3265
	Restriction	L2	14b	24.14			0.282
	Control	M2	15a	23.65	-1.16	24.23	0.392	0.2865
	Control	N2	15b	24.81			0.181
	Restriction	O2	16a	23.99	-0.67	24.325	0.312	0.256
	Restriction	P2	16b	24.66			0.2

## Sheet: FBP
	Manip Luis.P_ShrimpDay40_Trial 4_RT01/09/2017_Mélanie SERUSIER
	Gene FBP
	Pos	Name	Cp	Diff	Mean	SD		Position	Name	Ct
	G7	D20	23.94	0.26	23.785	-0.87		A7	bADN
	G8	D20	23.68					B7	bADN
	H7	D20	23.76					E7	bPCR
	H8	D20	23.76					F7	bPCR
	I7	D40	24.54	0.18	24.655	-0.9125		C7	bRT
	I8	D40	24.72					D7	bRT
	J7	D40	24.66
	J8	D40	24.7					Error	0.0281
	K7	D80	25.66	0.34	25.5675	-1.1975		Efficiency	2.126
	K8	D80	25.65					Link	0
	L7	D80	25.64
	L8	D80	25.32
	M7	D160	26.81	0.09	26.765	-1.02
	M8	D160
	N7	D160	26.72
	N8	D160
	O7	D320	27.8	0.03	27.785
	O8	D320
	P7	D320	27.77
	P8	D320
	Conditions	Position	Name	Ct	Diff Ct	Mean Ct	Concentration	Mean
	Control	A5	1a	26.48	1.76	25.6	0.129	0.3075
	Control	B5	1b	24.72			0.486
	Restriction	C5	2a	26.79	0.78	26.4	0.102	0.143
	Restriction	D5	2b	26.01			0.184
	Control	E5	3a	25.11	-0.05	25.135	0.363	0.355
	Control	F5	3b	25.16			0.347
	Restriction	G5	4a	24.72	-0.05	24.745	0.484	0.475
	Restriction	H5	4b	24.77			0.466
	Control	I5	5a	24.97	0.08	24.93	0.402	0.415
	Control	J5	5b	24.89			0.428
	Restriction	K5	6a	24.88	-0.95	25.355	0.431	0.321
	Restriction	L5	6b	25.83			0.211
	Control	M5	7a	25.02	-0.52	25.28	0.388	0.3245
	Control	N5	7b	25.54			0.261
	Restriction	O5	8a	25.55	-0.74	25.92	0.258	0.2035
	Restriction	P5	8b	26.29			0.149
	Control	A6	9a	26.5	-0.81	26.905	0.127	0.098
	Control	B6	9b	27.31			0.069
	Restriction	C6	10a	26.83	0.13	26.765	0.0988	0.1039
	Restriction	D6	10b	26.7			0.109
	Control	E6	11a	27.07	0.47	26.835	0.0826	0.1003
	Control	F6	11b	26.6			0.118
	Restriction	G6	12a	26.66	0.83	26.245	0.113	0.1615
	Restriction	H6	12b	25.83			0.21
	Control	I6	13a	25.7	-0.07	25.735	0.232	0.2255
	Control	J6	13b	25.77			0.219
	Restriction	K6	14a	25.47	-0.28	25.61	0.276	0.2495
	Restriction	L6	14b	25.75			0.223
	Control	M6	15a	24.89	-0.91	25.345	0.425	0.32
	Control	N6	15b	25.8			0.215
	Restriction	O6	16a	25.22	-0.8	25.62	0.332	0.257
	Restriction	P6	16b	26.02			0.182

## Sheet: LDH
	Manip Luis.P_ShrimpDay40_Trial 4_RT01/09/2017_Mélanie SERUSIER
	Gene LDH
	Pos	Name	Cp	Diff	Mean	SD		Position	Name	Ct
	G11	D20	23.61	0.06	23.6325	-1.0525		A11	bADN
	G12	D20	23.67					B11	bADN
	H11	D20	23.61					E11	bPCR	36.22
	H12	D20	23.64					F11	bPCR
	I11	D40	24.65	0.08	24.685	-1.0625		C11	bRT
	I12	D40	24.66					D11	bRT
	J11	D40	24.73
	J12	D40	24.7					Error	0.00568
	K11	D80	25.71	0.07	25.7475	-1.0125		Efficiency	1.928
	K12	D80	25.73					Link	0
	L11	D80	25.78
	L12	D80	25.77
	M11	D160	26.84	0.18	26.76	-1.1
	M12	D160	26.75
	N11	D160	26.79
	N12	D160	26.66
	O11	D320	27.87	0.02	27.86
	O12	D320
	P11	D320	27.85
	P12	D320
	Conditions	Position	Name	Ct	Diff Ct	Mean Ct	Concentration	Mean
	Control	A9	1a	26.54	1.22	25.93	0.148	0.239
	Control	B9	1b	25.32			0.33
	Restriction	C9	2a	26.66	0.79	26.265	0.136	0.1825
	Restriction	D9	2b	25.87			0.229
	Control	E9	3a	25.84	0.24	25.72	0.234	0.254
	Control	F9	3b	25.6			0.274
	Restriction	G9	4a	25.6	0.15	25.525	0.274	0.2875
	Restriction	H9	4b	25.45			0.301
	Control	I9	5a	25.77	0.23	25.655	0.245	0.2645
	Control	J9	5b	25.54			0.284
	Restriction	K9	6a	25.52	-0.75	25.895	0.288	0.232
	Restriction	L9	6b	26.27			0.176
	Control	M9	7a	25.05	-0.63	25.365	0.391	0.3255
	Control	N9	7b	25.68			0.26
	Restriction	O9	8a	25.69	-0.52	25.95	0.258	0.2205
	Restriction	P9	8b	26.21			0.183
	Control	A10	9a	26.84	-0.42	27.05	0.122	0.10695
	Control	B10	9b	27.26			0.0919
	Restriction	C10	10a	26.42	0.1	26.37	0.159	0.1645
	Restriction	D10	10b	26.32			0.17
	Control	E10	11a	26.2	0.37	26.015	0.184	0.2095
	Control	F10	11b	25.83			0.235
	Restriction	G10	12a	26.05	0.57	25.765	0.203	0.25
	Restriction	H10	12b	25.48			0.297
	Control	I10	13a	25.01	-0.15	25.085	0.403	0.3845
	Control	J10	13b	25.16			0.366
	Restriction	K10	14a	25.94	-0.54	26.21	0.22	0.187
	Restriction	L10	14b	26.48			0.154
	Control	M10	15a	25.47	-0.76	25.85	0.297	0.2385
	Control	N10	15b	26.23			0.18
	Restriction	O10	16a	25.52	-0.61	25.825	0.289	0.2415
	Restriction	P10	16b	26.13			0.194

## Sheet: PK
	Manip Luis.P_ShrimpDay40_Trial 4_RT01/09/2017_Mélanie SERUSIER
	Gene PK
	Pos	Name	Cp	Diff	Mean	SD		Position	Name	Ct
	G15	D20	21.99	0.06	21.995	-1.0625		A15	bADN
	G16	D20	21.97					B15	bADN	32.43
	H15	D20	22.03					E15	bPCR
	H16	D20	21.99					F15	bPCR	40
	I15	D40	23	0.12	23.0575	-1.035		C15	bRT
	I16	D40	23.06					D15	bRT
	J15	D40	23.05
	J16	D40	23.12					Error	0.00657
	K15	D80	24.04	0.14	24.0925	-1.04		Efficiency	1.952
	K16	D80	24.05					Link	0
	L15	D80	24.1
	L16	D80	24.18
	M15	D160	25.09	0.09	25.1325	-0.9975
	M16	D160	25.1
	N15	D160	25.16
	N16	D160	25.18
	O15	D320	26.16	0.07	26.13
	O16	D320	26.09
	P15	D320	26.14
	P16	D320	26.13
	Conditions	Position	Name	Ct	Diff Ct	Mean Ct	Concentration	Mean
	Control	A13	1a	24.96	1.03	24.445	0.139	0.2075
	Control	B13	1b	23.93			0.276
	Restriction	C13	2a	25.04	0.98	24.55	0.131	0.192
	Restriction	D13	2b	24.06			0.253
	Control	E13	3a	24.12	0.12	24.06	0.243	0.253
	Control	F13	3b	24			0.263
	Restriction	G13	4a	23.9	0.15	23.825	0.281	0.296
	Restriction	H13	4b	23.75			0.311
	Control	I13	5a	23.68	0.06	23.65	0.327	0.3335
	Control	J13	5b	23.62			0.34
	Restriction	K13	6a	23.15	-0.97	23.635	0.464	0.3535
	Restriction	L13	6b	24.12			0.243
	Control	M13	7a	23.17	-0.52	23.43	0.458	0.391
	Control	N13	7b	23.69			0.324
	Restriction	O13	8a	23.92	-0.63	24.235	0.278	0.23
	Restriction	P13	8b	24.55			0.182
	Control	A14	9a	24.44	-1	24.94	0.196	0.148
	Control	B14	9b	25.44			0.1
	Restriction	C14	10a	24.45	-0.39	24.645	0.195	0.1725
	Restriction	D14	10b	24.84			0.15
	Control	E14	11a	24.25	-0.2	24.35	0.223	0.209
	Control	F14	11b	24.45			0.195
	Restriction	G14	12a	24.34	0.05	24.315	0.209	0.213
	Restriction	H14	12b	24.29			0.217
	Control	I14	13a	23.06	-0.8	23.46	0.493	0.391
	Control	J14	13b	23.86			0.289
	Restriction	K14	14a	23.69	-0.75	24.065	0.325	0.2605
	Restriction	L14	14b	24.44			0.196
	Control	M14	15a	23.44	-1.36	24.12	0.382	0.268
	Control	N14	15b	24.8			0.154
	Restriction	O14	16a	23.13	-1.32	23.79	0.472	0.333
	Restriction	P14	16b	24.45			0.194

[truncated: 20 more sheets: HK, CoxA, CoxB, CoxC, ATPb, ATPa, GLUT2, GLUT1, GDH, GS, Chytry, Lipase, Tryp, TRYP 62, Amy, CHH, FAS, COXb (2), GS (2), FBP (2)]
